# Supplementary material for: SARS-CoV-2 seroprevalence and living conditions in Bamako (Mali): a cross-sectional multistage household survey after the first epidemic wave, 2020
Source: PubMed Central journal article supplement — BMJ Open. 2023 Apr 20;13(4):e067124. doi: 10.1136/bmjopen-2022-067124 (PMC10123860; doi:10.1136/bmjopen-2022-067124), 2023-04-20
Supplement: bmjopen-2022-067124.draft_revisions.pdf [file bmjopen-2022-067124.draft_revisions.pdf]

# BMJ Open

BMJ Open is committed to open peer review. As part of this commitment we make the peer review history of every article we publish publicly available.

When an article is published we post the peer reviewers' comments and the authors' responses online. We also post the versions of the paper that were used during peer review. These are the versions that the peer review comments apply to.

The versions of the paper that follow are the versions that were submitted during the peer review process. They are not the versions of record or the final published versions. They should not be cited or distributed as the published version of this manuscript.

BMJ Open is an open access journal and the full, final, typeset and author-corrected version of record of the manuscript is available on our site with no access controls, subscription charges or pay-per-view fees (<http://bmjopen.bmj.com>).

If you have any questions on BMJ Open's open peer review process please email [info.bmjopen@bmj.com](mailto:info.bmjopen@bmj.com)

# BMJ Open

## SARS-CoV-2 seroprevalence and living conditions in Bamako (Mali): a cross-sectional multistage household survey after the first epidemic wave, 2020

|                               |                                                                                                                                                                                                                                                                                                                                                                                                                                                                                                                                                                                                                                                                                                                                                                                                                                                                                                                                                                                                                                                                                                                                                                                                                                                                                                                                                                                                                                                                                                                                                                                                                                                                                                                                                                                                                                                                                                                                                                                                                                                                                                                                                                                                                                                                           |
|-------------------------------|---------------------------------------------------------------------------------------------------------------------------------------------------------------------------------------------------------------------------------------------------------------------------------------------------------------------------------------------------------------------------------------------------------------------------------------------------------------------------------------------------------------------------------------------------------------------------------------------------------------------------------------------------------------------------------------------------------------------------------------------------------------------------------------------------------------------------------------------------------------------------------------------------------------------------------------------------------------------------------------------------------------------------------------------------------------------------------------------------------------------------------------------------------------------------------------------------------------------------------------------------------------------------------------------------------------------------------------------------------------------------------------------------------------------------------------------------------------------------------------------------------------------------------------------------------------------------------------------------------------------------------------------------------------------------------------------------------------------------------------------------------------------------------------------------------------------------------------------------------------------------------------------------------------------------------------------------------------------------------------------------------------------------------------------------------------------------------------------------------------------------------------------------------------------------------------------------------------------------------------------------------------------------|
| Journal:                      | <i>BMJ Open</i>                                                                                                                                                                                                                                                                                                                                                                                                                                                                                                                                                                                                                                                                                                                                                                                                                                                                                                                                                                                                                                                                                                                                                                                                                                                                                                                                                                                                                                                                                                                                                                                                                                                                                                                                                                                                                                                                                                                                                                                                                                                                                                                                                                                                                                                           |
| Manuscript ID                 | bmjopen-2022-067124                                                                                                                                                                                                                                                                                                                                                                                                                                                                                                                                                                                                                                                                                                                                                                                                                                                                                                                                                                                                                                                                                                                                                                                                                                                                                                                                                                                                                                                                                                                                                                                                                                                                                                                                                                                                                                                                                                                                                                                                                                                                                                                                                                                                                                                       |
| Article Type:                 | Original research                                                                                                                                                                                                                                                                                                                                                                                                                                                                                                                                                                                                                                                                                                                                                                                                                                                                                                                                                                                                                                                                                                                                                                                                                                                                                                                                                                                                                                                                                                                                                                                                                                                                                                                                                                                                                                                                                                                                                                                                                                                                                                                                                                                                                                                         |
| Date Submitted by the Author: | 08-Aug-2022                                                                                                                                                                                                                                                                                                                                                                                                                                                                                                                                                                                                                                                                                                                                                                                                                                                                                                                                                                                                                                                                                                                                                                                                                                                                                                                                                                                                                                                                                                                                                                                                                                                                                                                                                                                                                                                                                                                                                                                                                                                                                                                                                                                                                                                               |
| Complete List of Authors:     | <p>Cissoko, Mady; IRD, INSERM, Aix Marseille Univ, SESSTIM, ISSPAM, Marseille, France; Malaria Research and Training Center, Parasitologie Landier, Jordi; IRD, INSERM, Aix Marseille Univ, SESSTIM, ISSPAM, Marseille, France, SESSTIM UMR1252</p> <p>Kouriba, Bourema; Centre d'Infectiologie Clinique Charles Mérieux, Bamako, Mali</p> <p>Sangare, Abdoul; Centre d'Infectiologie Clinique Charles Mérieux, Bamako, Mali</p> <p>Katilé , Abdoulaye; Malaria Research and Training Centre Ogobara K. Doumbo (MRTC-OKD), FMOS-FAPH, Mali-NIAID-ICER, Université des Sciences, des Techniques et des Technologies de Bamako, 1805 Bamako, Mali; Aix Marseille Univ, INSERM, IRD, ISSPAM, UM1252, 13005 Marseille, France</p> <p>Djimde, Abdoulaye A.; Malaria Research and Training Center, Université des Sciences, Techniques et Technologies, Bamako, Mali</p> <p>Berthé , Ibrahima ; Malaria Research and Training Centre Ogobara K. Doumbo (MRTC-OKD), FMOS-FAPH, Mali-NIAID-ICER, Université des Sciences, des Techniques et des Technologies de Bamako, 1805 Bamako, Mali; Direction générale de la santé et de l'hygiène publique du ministère de la santé et du développement social, Bamako, Mali</p> <p>Traore, Siriman; Malaria Research and Training Center, Université des Sciences, Techniques et Technologies, Bamako, Mali</p> <p>Thera, Ismaila; Malaria Research and Training Center, Université des Sciences, Techniques et Technologies, Bamako, Mali</p> <p>Hadiata, Maiga; Centre d'Infectiologie Clinique Charles Mérieux, Bamako, Mali</p> <p>Sogodogo, Elisabeth; Centre d'Infectiologie Clinique Charles Mérieux, Bamako, Mali</p> <p>Coulibaly, Karyn; Centre d'Infectiologie Clinique Charles Mérieux, Bamako, Mali</p> <p>Guindo, Abdoulaye; Direction générale de la santé et de l'hygiène publique du ministère de la santé et du développement social, Bamako, Mali</p> <p>Dembele, Ousmane; Direction générale de la santé et de l'hygiène publique du ministère de la santé et du développement social, Bamako, Mali</p> <p>Sanogo, Souleymane; Direction régionale de Tombouctou et établissement public hospitalier de Tombouctou, Tombouctou, Mali</p> <p>Doumbia, Zoumana; Direction régionale de Tombouctou et établissement</p> |

|           |                                                                                                                                                                                                                                                                                                                                                                                                                                                                                                                                                                                                                                                                                                                                                                                                                                                                                                                                                                                                                                                                                                                                                                                                           |
|-----------|-----------------------------------------------------------------------------------------------------------------------------------------------------------------------------------------------------------------------------------------------------------------------------------------------------------------------------------------------------------------------------------------------------------------------------------------------------------------------------------------------------------------------------------------------------------------------------------------------------------------------------------------------------------------------------------------------------------------------------------------------------------------------------------------------------------------------------------------------------------------------------------------------------------------------------------------------------------------------------------------------------------------------------------------------------------------------------------------------------------------------------------------------------------------------------------------------------------|
|           | <p>public hospitalier de Tombouctou, Tombouctou, Mali<br/> Dara, Charles; Direction régionale de Tombouctou et établissement<br/> public hospitalier de Tombouctou, Tombouctou, Mali<br/> Altmann, Mathias; INSERM, IRD, Bordeaux Population Health, Bordeaux,<br/> France<br/> Bonnet, Emmanuel ; Institut de recherche pour le developpement,<br/> Résiliances<br/> Balique, Hubert; Direction générale de la santé et de l'hygiène publique<br/> du ministère de la santé et du développement social, Bamako, Mali<br/> Sagaon-Teyssier, Luis; IRD, INSERM, Aix Marseille Univ, SESSTIM,<br/> ISSPAM, Marseille, France; ARCAD Santé Plus / Centre Intégré de<br/> Recherche, de Soins et d'Action Communautaire (CIRSAC), Bamako, Mali<br/> Vidal, Laurent; SESSTIM<br/> Sagara, Issaka; Université des Sciences des Techniques et des<br/> Technologies de Bamako, Malaria Research and Training Center (MRTC)<br/> Bendiane, Marc-Karim; IRD, INSERM, Aix Marseille Univ, SESSTIM,<br/> ISSPAM, Marseille, France<br/> Gaudart, Jean; Aix-Marseille Université, IRD, INSERM, Aix Marseille Univ,<br/> SESSTIM, ISSPAM,; Assistance Publique Hopitaux de Marseille,<br/> Biostatistics &amp; ICT</p> |
| Keywords: | COVID-19, EPIDEMIOLOGY, Tropical medicine < INFECTIOUS DISEASES                                                                                                                                                                                                                                                                                                                                                                                                                                                                                                                                                                                                                                                                                                                                                                                                                                                                                                                                                                                                                                                                                                                                           |
|           |                                                                                                                                                                                                                                                                                                                                                                                                                                                                                                                                                                                                                                                                                                                                                                                                                                                                                                                                                                                                                                                                                                                                                                                                           |

SCHOLARONE™  
Manuscripts

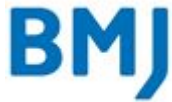

I, the Submitting Author has the right to grant and does grant on behalf of all authors of the Work (as defined in the below author licence), an exclusive licence and/or a non-exclusive licence for contributions from authors who are: i) UK Crown employees; ii) where BMJ has agreed a CC-BY licence shall apply, and/or iii) in accordance with the terms applicable for US Federal Government officers or employees acting as part of their official duties; on a worldwide, perpetual, irrevocable, royalty-free basis to BMJ Publishing Group Ltd ("BMJ") its licensees and where the relevant Journal is co-owned by BMJ to the co-owners of the Journal, to publish the Work in this journal and any other BMJ products and to exploit all rights, as set out in our [licence](#).

The Submitting Author accepts and understands that any supply made under these terms is made by BMJ to the Submitting Author unless you are acting as an employee on behalf of your employer or a postgraduate student of an affiliated institution which is paying any applicable article publishing charge ("APC") for Open Access articles. Where the Submitting Author wishes to make the Work available on an Open Access basis (and intends to pay the relevant APC), the terms of reuse of such Open Access shall be governed by a Creative Commons licence – details of these licences and which [Creative Commons](#) licence will apply to this Work are set out in our licence referred to above.

Other than as permitted in any relevant BMJ Author's Self Archiving Policies, I confirm this Work has not been accepted for publication elsewhere, is not being considered for publication elsewhere and does not duplicate material already published. I confirm all authors consent to publication of this Work and authorise the granting of this licence.

# 1 SARS-CoV-2 seroprevalence and living conditions in Bamako (Mali): a cross- 2 sectional multistage household survey after the first epidemic wave, 2020

3  
4  
5  
6  
7 4 Mady Cissoko<sup>1,2,5\*</sup>, Jordi Landier<sup>1\*</sup>, Bourema Kouriba<sup>3\*</sup>, Abdoul Karim Sangare<sup>3</sup>, Abdoulaye Katile<sup>1,2</sup>,  
8 Abdoulaye Djimdé<sup>2</sup>, Ibrahima Berthé<sup>4</sup>, Siriman Traoré<sup>2</sup>, Ismaïla Thera<sup>2</sup>, Hadiata Maiga<sup>3</sup>, Elisabeth  
9 Sogodogo<sup>3</sup>, Karyn Coulibaly<sup>3</sup>, Abdoulaye Guindo<sup>4</sup>, Ousmane Dembelé<sup>4</sup>, Souleymane Sanogo<sup>5</sup>, Zoumana  
10 Doumbia<sup>5</sup>, Charles Dara<sup>5</sup>, Mathias Altmann<sup>6</sup>, Emmanuel Bonnet<sup>7</sup>, Hubert Balique<sup>4</sup>, Luis Sagaon-  
11 Teyssier<sup>1,8</sup>, Laurent Vidal<sup>1</sup>, Issaka Sagara<sup>2§</sup>, Marc-Karim Bendiane<sup>1§</sup>, Jean Gaudart<sup>1,2,9§</sup>

12  
13  
14 10 1 IRD, INSERM, Aix Marseille Univ, SESSTIM, ISSPAM, Marseille, France

15 11 2 Malaria Research and Training Center, Université des Sciences, Techniques et Technologies, Bamako,  
16 12 Mali

17 13 3 Centre d'Infectiologie Clinique Charles Mérieux, Bamako, Mali

18 14 4 Direction générale de la santé et de l'hygiène publique du ministère de la santé et du développement  
19 15 social, Bamako, Mali

20 16 5 Direction régionale de Tombouctou et établissement public hospitalier de Tombouctou,  
21 17 Tombouctou, Mali

22 18 6 INSERM, IRD, Bordeaux Population Health, Bordeaux, France

23 19 7 IRD, Unité resiliance, Paris, France

24 20 8 ARCAD Santé Plus / Centre Intégré de Recherche, de Soins et d'Action Communautaire (CIRSAC),  
25 21 Bamako, Mali

26 22 9 AP-HM, Hopital La Timone, BioSTIC, Biostatistics and Modeling unit, Marseille, France

27 23  
28 24 \* contributed equally and sharing co-first authorship

29 25 § contributed equally and sharing co-last authorship

30 26 Corresponding author: Jean Gaudart

31 27 Aix Marseille Univ, IRD, INSERM, SESSTIM, ISSPAM, AP-HM, Hopital La Timone, BioSTIC, Biostatistics  
32 28 and Modeling unit, Marseille, France

33 29 [Jean.gaudart@univ-amu.fr](mailto:Jean.gaudart@univ-amu.fr)

## 34 30 35 31 **Abstract**

### 36 32 **Objectives**

37 33 In low-income settings with limited access to diagnosis, COVID-19 information are scarce. In  
38 34 September 2020, after the first COVID-19 wave, Mali reported 3,086 confirmed cases and 130 deaths.  
39 35 Most reports originated from Bamako, with 1,532 cases and 81 deaths (2.42 million inhabitants). This  
40 36 observed prevalence of 0.06% appeared very low. Our objective was to estimate SARS-CoV-2 infection  
41 37 among inhabitants of Bamako, after the first epidemic wave. We assessed demographic, social and  
42 38 living conditions, health behaviors and knowledge associated with SARS-CoV-2 seropositivity.

### 43 39 44 40 **Settings**

45 41 We conducted a cross-sectional multistage household survey in 3 neighborhoods of the commune VI  
46 42 (Bamako), which reported, September 2020, 30% of the reported cases.

### 47 43 48 44 **Participants**

49 45 We recruited 1,526 inhabitants in 3 areas, i.e. 306 households, and 1,327 serological results ( $\geq 1$  years),  
50 46 220 household questionnaires and collected answers for 962 participants ( $\geq 12$  years).

### 51 47 52 48 **Primary and secondary outcome measures**

1  
2  
3 49 We measured serological status, detecting SARS-CoV-2 spike protein Antibodies in blood sampled. We  
4 50 documented housing conditions and individual health behaviors through questionnaires among  
5 51 participants. We estimated the number of SARS-CoV-2 infections and deaths in the population of  
6 52 Bamako using the age and sex distributions.  
7

8 53

## 9 54 **Results**

10 55 The prevalence of SARS-CoV-2 seropositivity was 16.4% after adjusting on the population structure.  
11 56 This suggested that ~400,000 cases and ~2,000 deaths could have occurred of which only 0.4% of cases  
12 57 and 5% of deaths were officially reported. Questionnaires analyses suggested strong agreement with  
13 58 washing hands but lower acceptability of movement restrictions (lockdown/curfew), and mask  
14 59 wearing.  
15 60

16 60

## 17 61 **Conclusions**

18 62 The first wave of SARS-CoV-2 spread broadly in Bamako. Expected fatalities remained limited largely  
19 63 due to the population age structure and the low prevalence of comorbidities. Improving diagnostic  
20 64 capacities to encourage testing and preventive behaviors, and avoiding the spread of false information  
21 65 remain key pillars, not matter the developed or developing setting.  
22 66

23 66

## 24 67 **Registration number**

25 68 2020-001424-MSAS-SG  
26 69

27 69

28 70 **Keywords:** COVID-19, sero-prevalence, living conditions, knowledge attitude behavior and practice.  
29 71

30 71

## 31 72 **Strengths and limitations of this study**

32 73

- 33 74 • In Mali, this is the first study assessing living condition and SARS-CoV-2 seroprevalence
- 34 75 • A multi-stage cross-sectional survey has been implemented in the main affected neighborhood  
35 76 of Bamako, the capital city, after the first COVID-19 wave
- 36 77 • In addition to the blood samples for SARS-CoV-2 serology, the survey collected household  
37 78 questionnaires on living conditions and individual questionnaires on Knowledges Attitudes  
38 79 Behaviors and Practices
- 39 80 • A logistic generalized additive multilevel model was implemented to estimate factors associated  
40 81 with SARS-CoV-2 seropositivity
- 41 82 • However, a new study needs to be done to complete the seroprevalence estimate after 2 years  
42 83 of COVID-19, including other neighborhoods of Bamako.  
43 84

44 84

45 84

46 84

47 84

48 84

49 84

50 84

51 84

52 84

53 84

54 84

55 84

56 84

57 84

58 84

59 84

60 84

## Background

COVID-19 disease, due to the Severe Acute Respiratory Syndrome Coronavirus 2 (SARS-CoV-2), which emerged at the end of 2019 in Wuhan, China, has spread rapidly around the world and was declared as "pandemic" on 11 March 2020 by the World Health Organization (WHO) [1]. Despite setting up public health policies appropriated to this pandemic situation, such as lockdown, quarantine and curfew, the virus continues to circulate [2, 3] The WHO African Region reported the least number of affected people since the pandemic began. Indeed, in many resource-limited settings, biological confirmation was only available in tertiary medical facilities and has been reserved for symptomatic patients (mostly severe) and/or travelers, the various national policies requiring a negative test for travel. As a result, the number of people exposed to the virus in Sub-Saharan Africa is still largely unknown [1].

After the first reported case on March 25<sup>th</sup> 2020 (coming from France on March 12<sup>th</sup>), Mali has recorded, 6 months later (at the time of the survey), 3,086 cases of SARS-CoV-2 diagnosed by RT-PCR, i.e. an incidence rate of 0.015% for the whole country. Spread over 38 health districts (among 75), they led 130 reported deaths, i.e. a case fatality rate of 4.2%[4].

Among the recorded cases at M6 (September 2020), ~50% were reported in the district of Bamako i.e. 1,532 reported cases, for a population of at least 2.42 million inhabitants. The most affected area was the Commune VI with 466 reported cases and 27 associated deaths. The second largest number of recorded cases was reported in the region of Timbuktu, with 572 confirmed cases at M6 [4].

Given the limited access to diagnosis and care, and in the absence of a reliable syndromic surveillance, the low number of reported cases did not allow to assess accurately the epidemic situation. In this context, serological surveys represent an important tool to assess the extent of the exposure to SARS-CoV-2 in the general population. A single survey provides a snapshot of the extent of the virus spread at a given time point, and informs on vulnerable population groups, on the denominators used to calculate infection fatality rate or hospitalization rates [5]. In Mali, a multi-site study including a peri-urban area of the capital city Bamako demonstrated a sharp increase in seroprevalence between a survey conducted after the first wave of clinical cases (August 2020) and a survey conducted during the decrease of the second wave (January 21), identifying geographical location and age as associated factors [6]. Indeed, Sagara *et al.* reported in the peri-urban area of Sotuba a crude seroprevalence of 13.1 % (n=587) after the first wave. In the capital city of Kinshasa, Nkuba *et al.* reported a similar result with a seroprevalence of 16.6% (n=1233) [7].

Seroprevalence is also essential to assess the level of herd immunity that has been developed, which determines the risk of the following epidemic waves, their potential severity and their potential impact on the healthcare system. Measuring immunity could also help develop response strategies including priority strains for vaccination or targeted awareness campaigns.

In the settings where mortality and hospitalization statistics are not readily available, approximating the number of infections by age groups and by gender was also important to estimate the order of magnitude for expected infection fatality rates and compare it to reported COVID-19 deaths [8].

In addition, better access to information on epidemiological trends, social factors associated, health and protective behaviors, as well as attitudes and beliefs, was needed to design control strategies and strengthen information and awareness campaigns.

The aim of this study was to estimate the seroprevalence of SARS-CoV-2 in the population of the most populated and affected commune of Bamako, after the first epidemic wave. We also assessed demographic, social and living conditions; health behaviors; and knowledge associated with SARS-CoV-2 seropositivity.

## Methods

### Study design and sample size calculation

1  
2  
3 135 In accordance with the WHO guidelines protocol for age-stratified population-based sero-  
4 136 epidemiological surveys for COVID-19 infection, a cross-sectional household survey was conducted [8]  
5 137 in the 3 most affected and populated neighborhoods of Bamako's commune VI: Faladié,  
6 138 Banakabougou, and Yirimadjo (Figure 1), September 2020. At the time of the protocol (July 2020), the  
7 139 number of cases reported was 38, 29, and 40 respectively for these neighborhoods, representing 0.07  
8 140 cases/ 100 inhabitants, and 54% of the total reported cases in Commune VI.  
9 141

10 142  
11 143 **Figure 1: Map of Bamako showing the location of the 3 investigated neighborhoods within the**  
12 144 **Commune VI (in red).**  
13 145

14 146 The sample size was calculated assuming an expected prevalence of COVID-19 infection of 0.07 cases/  
15 147 100 inhabitants, within the population. Based on this assumption, a sample size of 1300 persons was  
16 148 estimated, with a precision of 2% and a confidence interval of 95%. Considering 15% loss, 1500 people  
17 149 was expected to be included. A multi-stage cluster sampling method covering all age  $\geq 1$  groups of the  
18 150 population was performed [9]. In the first stage, the sample size to be recruited per district was  
19 151 proportional to the district population sizes. In the second stage, each district was divided into  
20 152 different sectors (4 or more) of relatively equal sub-population size. The household survey therefore  
21 153 concerned each sector of each district. The first household in each sector was selected by choosing a  
22 154 random direction from the center of the community sector, counting the houses along that road and  
23 155 selecting one at random. Subsequent households were selected by visiting the closest house to the  
24 156 previous one. All household members in the age range willing to participate were recruited. The study  
25 157 was conducted among the general population aged  $\geq 1$ -year-old for the seroprevalence study, and  $\geq 12$ -  
26 158 year-old for the questionnaire survey. A housing unit was defined as a private one, such as apartment  
27 159 or villa or collective house (living quarter called "compound") with its own separate entry. Common  
28 160 residence rules (*de jure* rules) defined household unit as group of first-degree relatives usually living in  
29 161 the same housing unit. This approach allowed considering Malian family structure and local housing  
30 162 habits to define household units.  
31 163

### 32 164 **Individual sample and data collection**

33 165 After informed consent obtained from the participants or their parents, 2mL of blood were collected  
34 166 from all voluntary participants by venipuncture (September 2020), to perform serological tests.  
35 167 Following the blood sampling, a face-to-face questionnaire was administered to collect the following  
36 168 demographic and sociologic factors: gender, age, history of recent travel within and outside Bamako,  
37 169 socio-economic level, contact with COVID-19 cases, occupation, education level, recent clinical  
38 170 symptoms, recent treatment, and attendance at places of worship. The questionnaire also included  
39 171 items relative to the knowledge about the disease, protective measures and consequences on the  
40 172 population health.  
41 173

### 42 174 **Housing conditions and household data collection**

43 175 The head of household was asked to answer a specific questionnaire documenting their individual  
44 176 characteristics (age, gender, education, profession), household structure (number and age of  
45 177 members) and housing conditions including housing equipment, goods, and incomes of family (auto,  
46 178 TV, moto, cell phone, external funding...).

### 47 179 **Biological analyses**

48 180  
49 181 The level of exposure of the population to SARS-CoV-2 was estimated by serology. Sera were separated  
50 182 from whole blood and stored at  $-80^{\circ}\text{C}$  in cryotubes. SARS-CoV-2 specific IgM and IgG antibodies were  
51 183 assayed in sera by VIDAS<sup>®</sup> anti-SARS-CoV-2 IgM and anti-SARS-CoV-2 IgG kits (BioMerieux, Lyon,  
52 184 France) [10]. The VIDAS<sup>®</sup> anti-SARS-CoV-2 IgM and anti-SARS-CoV-2 IgG tests relied on the SARS-CoV-



1  
2  
3 185 2 Spike protein immunoassay technique to measure the presence of antibodies in infected  
4 186 participants. Compared to PCR, the sensitivity of the VIDAS® tests for IgM and IgG is 90.4% and 88.6%,  
5 187 8-15 days after SARS-CoV-2 infection, 100 and 96.6%, 16 days after infection, respectively. The  
6 188 specificity for IgM and IgG is 99.4% and 99.6%, respectively. In this context, the specificity of the tests  
7 189 was particularly important to ensure that the test of an un-infected participant was indeed  
8 190 systematically negative. Serology analyses were performed at the Charles Mérieux Infectiology Centre  
9 191 in Bamako, Mali.

11 192 Participants were defined as SARS-CoV-2 seropositive if they presented either a positive IgG or IgM  
12 193 result. Individuals were defined as SARS-CoV-2 seronegative if they presented a negative IgG and IgM  
13 194 result, or a negative IgG and a missing IgM result. Individuals with missing IgG results were excluded  
14 195 from the seroprevalence analysis.

15 196 The seroprevalence was estimated as the number of SARS-CoV-2 seropositive by the number of  
16 197 participants. The number of infections for the district of Bamako was estimated using the population  
17 198 of Bamako by sex and age categories. The number of deaths was estimated by using the age- and sex-  
18 199 specific mortality data reported early in the pandemic (February-March in China, prior to the  
20 200 optimization of clinical management) [11].

21 201

## 22 202 **KABP outcomes measures**

23 203 The current at-risk practices have been measured using a four bipolar Likert Items on practices during  
24 204 the seven past days assessing: wearing mask when not at home, washing hands with soap, going to  
25 205 crowded areas during the day or the night. Concerning behavior questions, six bipolar Likert Items  
26 206 (from systematically/very often to never) on behavior changes since the start of the epidemic focusing  
27 207 on: washing hands, visiting friends and relatives, going to crowded areas, touching each other,  
28 208 sneezing into elbow, reducing travel. Concerning knowledge questions, a scale-score based on 13 items  
29 209 (True/False/Don't know) on prevention, treatment, symptoms, and transmission of SARS-CoV-2 has  
30 210 been build up. At least, concerning cultural beliefs, four bipolar Likert Items (from very agreed to very  
31 211 disagreed) assessed opinion about the disease focusing on infection origin: a divine punishment, a spell  
32 212 casting, a white people illness, a way to get money for rich people.

33 213

## 34 214 **Data analysis**

35 215 First, descriptive analyses estimated mean, prevalence and frequencies, associated with 95%  
36 216 confidence intervals (95%CI).

37 217 Household profiles were determined by using 2 step descriptive approach [12]: first a multiple  
38 218 component analysis (MCA), second a Hierarchical Ascendant Classification (HAC). Based on household  
39 219 level variables, this approach led to determine classes according to the different household profiles.  
40 220 Each individual was assigned to its household profile.

41 221

42 222 Second, in order to estimate factors associated with SARS-CoV-2 seropositivity, we used logistic  
43 223 generalized additive multilevel models (GAMM) [13]. We analyzed the effects of age and sex at  
44 224 individual level, as well as household profile. Intra-household contamination was assessed as a binary  
45 225 variable (more than 1 positive case or not). The GAMM approach allowed also verifying the non-linear  
46 226 effect of continuous covariates by using spline smoothing [14]. The model included random effects for  
47 227 household, compound and district sector to reflect sampling structure and potential correlations  
48 228 between participants sharing the same living space (household nested in compound sampled in the  
49 229 same sector). Main statistical tests were performed using an  $\alpha$ -probability threshold of 5%, but with  
50 230 Bonferroni correction for sub-group analysis.

51 231

52 232 Data analyses were performed using the SPSS software (IBM Corp. Released 2020. IBM SPSS Statistics  
53 233 for Windows, Version 27.0. Armonk, NY: IBM Corp) for the questionnaire data management and

54 234

55 235

56 236

57 237

58 238

59 239

60 240

234 descriptive analyses, and the R software (version 4.0.0, R Core Team 2020. R Foundation for Statistical  
235 Computing, Vienna, Austria.) with the following specific packages: {FactoMineR}, {lme4}, {gamm4}.

236

## 237 Ethics and regulations

238 The authorization to conduct the study was obtained on August 28<sup>th</sup>, 2020, from the Ministry of Health  
239 and Social Affairs of Mali (decision letter number 2020-001424-MSAS-SG). Clearance from the ethics  
240 committee of the Faculties of Medicine and Odonto-Stomatology and Pharmacy, University of  
241 Sciences, Technics and Technologies of Bamako (Mali) was obtained on August 10<sup>th</sup>, 2020 (clearance  
242 letter number 2020/162/CA/FMOS/FAPH). First, a community agreement was first obtained from  
243 district leaders, local religious leaders, community associations and municipal authorities after  
244 explanation and discussion about the study protocol. Second, consents and/or assents of participants  
245 or their parent/guardian were obtained. The study team administered consent in local languages, and,  
246 if the participant or parent/guardian was not literate, in the presence of a witness. Individuals from  
247 each family consented separately.

248

## 249 Patients and Public involvement

250

251 The national federation of community health associations is part of the COVID-19 national committee,  
252 contacted during study design. For recruitment, the local Community Health Association appointed  
253 community health workers as part as the field investigation team. The mayor of the commune, after  
254 receiving information on the study, issued a radio announcement to inform the population of the  
255 survey and to solicit their participation. A community representative, selected by the neighborhood  
256 head and independent from the research team, participated to the field study as a witness, ensuring  
257 that participants understand the study and that they have given their informed consent.

258 The field study team provided a report to the local authorities and to the community health  
259 association. All participants who wanted to have personal results (or any question about the study)  
260 had 2 medical contacts (telephone numbers). Public feedback meetings were held with the local  
261 community health association and the local authorities.

262

## 263 Results

264

### 265 Inclusions

266 A sample of 174 housing units (separate living quarter) were investigated including 2,015 inhabitants  
267 grouped in 306 identified household units.

268 Of 2,015 inhabitants, 1,526 (75.7%) participants aged  $\geq 1$  year provided a blood sample for the  
269 seroprevalence survey and 962 participants aged  $\geq 12$  years answered the KABP survey (Table 1).

270

271 **Table 1: Study participants' demographic characteristics and detailed serological results (Bamako,**  
272 **n=1,526, September 2020).**

|               |               | n   | %    |
|---------------|---------------|-----|------|
| <b>Site</b>   |               |     |      |
|               | Banankabougou | 588 | 38.5 |
|               | Faladie       | 300 | 19.7 |
|               | Yirimadio     | 638 | 41.8 |
| <b>Gender</b> |               |     |      |
|               | Male          | 599 | 39.3 |
|               | Female        | 927 | 60.7 |
| <b>Age</b>    |               |     |      |

|                           |                      |      |      |
|---------------------------|----------------------|------|------|
|                           | [1-10y]              | 416  | 27.3 |
|                           | [10-20y]             | 491  | 32.2 |
|                           | [20-30y]             | 299  | 19.6 |
|                           | [30-40y]             | 144  | 9.4  |
|                           | [40-60y]             | 118  | 7.7  |
|                           | [60-100]             | 51   | 3.3  |
|                           | NA                   | 7    | 0.5  |
| <b>SARS-CoV-2 status</b>  |                      |      |      |
|                           | Negative             | 1100 | 72.1 |
|                           | Positive             | 227  | 14.9 |
|                           | NA                   | 199  | 13.0 |
| <b>Detailed positives</b> |                      |      |      |
|                           | IgG pos only         | 170  |      |
|                           | IgM pos only         | 17   |      |
|                           | IgG+IgM              | 35   |      |
|                           | IgG pos, IgM missing | 5    |      |

Data on housing conditions were collected for 220 of the 306 household units included, *i.e.* 78.9% of the household members tested (n=1,204) (Figure 2).

### Figure 2: flowchart of the seroprevalence survey

### SARS-CoV-2 seroprevalence

Out of 1,526 participants, 2 did not provide samples, 170 had no interpretable test results for both IgG and IgM, and 27 inconclusive results due to a missing IgG and negative IgM results or inversely. Overall, interpretable serological results were available for 1,327 participants, corresponding to 227 SARS-CoV-2 seropositive (by either IgG, IgM or both) and 1,100 seronegative individuals. The crude seroprevalence rate was estimated at 17.1% (95% Confidence interval (95%CI) [15.1-19.1], ranging from less than 10% to upper than 30% across genders and age groups (Figure 3).

### Figure 3: Seroprevalence by age and sex (Bamako, n=1327, September 2020).

Applying estimated prevalence, by age and sex, to the population of the district of Bamako (2.42 million inhabitants), we estimated around 400,000 the number of infections in the city between the onset of the epidemic and the time of the survey (September 2020), compared to 1,532 recorded cases for the district of Bamako. This corresponded to an adjusted prevalence of 16.4% (adjusted on the population age and sex distribution) vs an observed prevalence of 0.06%. Using the age- and sex-specific mortality data reported early in the pandemic, we roughly estimated 1,725 COVID-19 deaths occurred between the onset of the pandemic and the date of the survey, *i.e.* more than twenty times the 81 official

299 reported deaths (Table 2). According to these estimates, the detection rates were low, with only 0.4%  
300 of cases and 5% of deaths reported.

301  
302 **Table 2: SARS-CoV-2 seroprevalence in the study sample, and estimated vs reported cases and**  
303 **deaths at Bamako city level after accounting for age population structure (Bamako, n=1,526,**  
304 **September 2020).**

| SARS-CoV-2 serological status |                          |                   |
|-------------------------------|--------------------------|-------------------|
|                               | negative                 | 1,100             |
|                               | positive                 | 227               |
|                               |                          | 17.1% [15.1-19.2] |
| Population                    |                          |                   |
|                               | inhabitants in 2020      | 2,420,000         |
| Prevalence                    |                          |                   |
|                               | Reported COVID cases (%) | 1,532 (0.07%)     |
|                               | Estimated infections (%) | 397,321 (16.4)    |
| COVID-19 associated Deaths    |                          |                   |
|                               | Reported deaths          | 81 (0.3)          |
|                               | Estimated deaths         | 1,725 (7.1)       |

305

306

307

### 308 Household profile as social proxy

309 Among the 220 households documented, 64.6% (n=142) lived in a private house, 19.1% (n=42) shared  
310 their house with another family and 12.3% (n=27) with two others. Only 0.9% (n=2) shared their house  
311 with more than two other families (three or four).

312 Assessing social characteristics and housing conditions, three specific profiles have been determined  
313 related to three social dimensions (Table 3): i) Location and family structure; ii) Goods and incomes;  
314 iii) Housing conditions. The first profile selected was labelled "Poor Small Family" unit (PSF, n=62), and  
315 the second "Poor Large Family" unit (PLF, n=117). These two profiles, mainly located at Yirimadio and  
316 Banankabougou, were associated with a low level of incomes or goods, and deleterious housing  
317 conditions. The main difference between these two profiles came from the household size: 8.1% of  
318 large family (>10 members) vs 27.4% (p=0.002). The PSF profile showed also slightly (but significant)  
319 less livestock than the PLF profile (8.1% vs 12.8%, p<0.001), slightly more private toilets (24.2% vs  
320 19.7%, p<0.001), and less rooms (14.5% vs 33.3%, p<0.001). Both profiles showed a low level of  
321 education (resp. 35.5% and 46.2% of no education), and around 50% of private house.

322

323 The third and last profile, mainly located at Faladie (68%), showed significant high level of incomes  
324 (75.6% with a private car, 41.5% having an external financial help, 43.9% having livestock) and best  
325 housing conditions (95.4% having a private house, 51.2% having private toilets, 80.5% having more  
326 than 4 rooms), and, consequently, was labelled "Rich Family" unit (RF, n=41).

327

328 **Table 3: Household units' main characteristics (Bamako, n=220, September 2020)**

329

|                                                   | PSF*    | PLF* | RF* | p value             |            |                     |
|---------------------------------------------------|---------|------|-----|---------------------|------------|---------------------|
|                                                   |         |      |     | Global              | PLF vs PSF | PLF vs RF           |
| <b>Dimension 1: Location and family structure</b> | (ref-%) | (%)  | (%) |                     |            |                     |
| Location                                          |         |      |     | <0.001 <sup>§</sup> | 0.052      | <0.001 <sup>§</sup> |

1  
2  
3  
4  
5  
6  
7  
8  
9  
10  
11  
12  
13  
14  
15  
16  
17  
18  
19  
20  
21  
22  
23  
24  
25  
26  
27  
28  
29  
30  
31  
32  
33  
34  
35  
36  
37  
38  
39  
40  
41  
42  
43  
44  
45  
46  
47  
48  
49  
50  
51  
52  
53  
54  
55  
56  
57  
58  
59  
60

|                                                                   |       |       |       |                     |                     |                     |
|-------------------------------------------------------------------|-------|-------|-------|---------------------|---------------------|---------------------|
| BANAKABOUGOU                                                      | 30.6% | 22.2% | 22.0% |                     |                     |                     |
| YIRIMADIO                                                         | 58.1% | 51.3% | 9.8%  |                     |                     |                     |
| FALADIE                                                           | 11.3% | 26.5% | 68.3% |                     |                     |                     |
| Large family (>10members vs less)                                 | 8.1%  | 27.4% | 46.3% | <0.001 <sup>§</sup> | 0.002 <sup>§</sup>  | <0.001 <sup>§</sup> |
| Family chief with low level of education (no school vs education) | 35.5% | 46.2% | 7.3%  | <0.001 <sup>§</sup> | 0.169               | <0.001 <sup>§</sup> |
| Family chief with high level of education (post-graduate vs no)   | 14.5% | 16.2% | 78.8% | <0.001 <sup>§</sup> | 0.763               | <0.001 <sup>§</sup> |
| <b>Dimension 2: Incomes and goods of Household unit</b>           |       |       |       |                     |                     |                     |
| Help from outside (members living outside Mali vs no)             | 4.8%  | 3.4%  | 41.5% | <0.001 <sup>§</sup> | 0.641               | <0.001 <sup>§</sup> |
| Goods: private car (yes vs no)                                    | 9.7%  | 9.5%  | 75.6% | <0.001 <sup>§</sup> | 0.952               | <0.001 <sup>§</sup> |
| Goods: livestock (yes vs no)                                      | 8.1%  | 12.8% | 43.9% | <0.001 <sup>§</sup> | <0.001 <sup>§</sup> | <0.001 <sup>§</sup> |
| <b>Dimension 3: Housing conditions</b>                            |       |       |       |                     |                     |                     |
| Private house (yes vs no)                                         | 45.2% | 49.6% | 85.4% | <0.001 <sup>§</sup> | 0.574               | <0.001 <sup>§</sup> |
| House with private toilets (yes vs no)                            | 24.2% | 19.7% | 51.2% | <0.001 <sup>§</sup> | <0.001 <sup>§</sup> | <0.001 <sup>§</sup> |
| Size of the housing unit (>4 vs 4<= rooms)                        | 14.5% | 33.3% | 80.5% | <0.001 <sup>§</sup> | <0.001 <sup>§</sup> | <0.001 <sup>§</sup> |

\*Household profiles defined by hierarchical clustering on components after MCA ('PSF' for Poor Small Family unit, 'PLF' for Poor large Family unit, RF for Rich Family)

<sup>§</sup>significant after Bonferroni correction

### Factors associated with SARS-CoV-2 seropositivity

Factors associated with SARS-CoV-2 seropositivity were identified with a multilevel logistic regression approach (table 4) (individual, household and neighborhood levels). There were no significant differences between the three neighborhoods. Women and older age were significantly associated with increased odds of seropositivity, showing respectively adjusted Odd Ratios (aOR [CI95%]) of 1.75 [1.27;2.43] and 1.06 [1.01;1.11]. Having a positive household member was associated with an increased odd of seropositivity (aOR=1.54 [1.08;2.19]). Household corresponding to the highest socio-demographic status appeared to have increased (but not significant, p=0.06) odds of seropositivity compared to households of poor status living in (aOR=1.74 [0.99;3.07]).

**Table 4: Factors associated with SARS-CoV-2 seropositivity**

|                                        |                                | SARS-CoV-2 serology<br>n(%) / median (IQR) |            | Univariate*         |                     | Multivariate*       |                     |
|----------------------------------------|--------------------------------|--------------------------------------------|------------|---------------------|---------------------|---------------------|---------------------|
|                                        |                                | neg                                        | pos        | OR<br>[CI95%]       | p                   | aOR<br>[CI95%]      | p                   |
| <b>Sex</b>                             | <b>Male</b>                    | 456 (87.2)                                 | 67 (12.8)  | 1                   |                     | 1                   |                     |
|                                        | <b>Female</b>                  | 644 (80.1)                                 | 160 (19.9) | 1.78<br>[1.28;2.49] | <0.001 <sup>§</sup> | 1.75<br>[1.27;2.43] | <0.001 <sup>§</sup> |
| <b>Age*</b>                            | <b>(+1 years)</b>              | 16 (9-25)                                  | 18 (11-30) | 1.07<br>[1.02;1.12] | 0.008 <sup>§</sup>  | 1.06<br>[1.01;1.11] | 0.017 <sup>§</sup>  |
| <b>Household profile</b>               | <b>Poor Small Family units</b> | 304 (84.9)                                 | 54 (15.1)  | 1                   |                     | 1                   |                     |
|                                        | <b>Poor Large Family units</b> | 456 (83.1)                                 | 93 (16.9)  | 1.08<br>[0.67;1.74] | 0.75                | 1.14<br>[0.74;1.74] | 0.56                |
|                                        | <b>Rich Family units</b>       | 119 (75.3)                                 | 39 (24.7)  | 1.66<br>[0.88;3.12] | 0.12                | 1.74<br>[0.99;3.07] | 0.06                |
|                                        | <b>Unclassified</b>            | 221 (84.4)                                 | 41 (15.6)  | 0.91<br>[0.52;1.58] | 0.74                | 1.03<br>[0.62;1.72] | 0.91                |
| <b>Already 1 case in the household</b> | <b>No</b>                      | 412 (86.9)                                 | 62 (13.1)  | 1                   |                     | 1                   |                     |
|                                        | <b>Yes</b>                     | 688 (80.7)                                 | 165 (19.3) | 1.37<br>[0.96;1.95] | 0.085               | 1.54<br>[1.08;2.19] | 0.018 <sup>§</sup>  |

| Neighborhood | Banankabougou | 454 (82.5) | 96 (17.5) | 1                   | 0.98 | Not included |  |
|--------------|---------------|------------|-----------|---------------------|------|--------------|--|
|              | Faladie       | 229 (82.4) | 49 (17.6) | 0.98<br>[0.57;1.70] |      |              |  |
|              | Yirimadio     | 417 (83.6) | 82 (16.4) | 1.03<br>[0.67;1.59] |      |              |  |

<sup>§</sup>significant test result

\* n=1327

\*\* n=1323 (4 participants showing negative serology with missing ages)

### Knowledge, attitudes, behaviors, practices (KABP)

The KABP score, using the 13 items (false/true/don't know questions) described in table 5, showed no mean differences according to gender, with respectively mean=7.9 vs 7.6,  $p=0.065$ .

Attitudes, behaviors and practices measured by age and gender (table 6a and 6b) showed, at first, a high level of denial on COVID-19 disease: a large part believed that COVID-19 was a punishment from God (43.7%), a belief mainly shared by older people (mean=25.1 years) compared to others (mean=21.7 years). Many participants believed that COVID-19 was introduced in Mali by white people (45.3%). Other opinion was less held among participants: almost one-third (30.3%) thought that COVID-19 was a way used by Malian politicians to take money from developed countries. This last opinion was more shared among men than women (33.6% vs 26.2%,  $p=0.01$ ). A small proportion of participants believed that COVID-19 was due to a spell (14.8%).

Concerning changes in daily preventive behaviors from the start of the COVID-19 pandemic, hand washing was reported as the most used by people: only 4.9% of the participants declared rarely, very rarely or never washing hands in their daily life, compared to 29.9% who declared washing hands systematically. Conversely, few participants reported adopting systematically other preventive behaviors in their daily life, such as blowing into the elbow (12.9%), stop touching other people (15.0%), traveling less frequently (11.1%), avoid populated places (9.3%), and avoiding seeing friends (6.6%). Regarding results displayed by age and sex (tables 6a and 6b), the youngest participants were more reluctant to change their daily behaviors whatever their gender.

Finally, most of the participants declared having at-risk practices during the 7 last days, such as never wearing mask when outside (32.7%), visiting very often or daily highly populated public places (31.0%), going out very often or every night (26.1%), not washing hands most of the time (43.2%), staying in closed spaces more than two hours daily or very often (22.4%), or participating to social or family events daily or very often (40,3%). Young participants declared wearing mask less systematically or very often: mean age=22 years vs mean age=25 years). Young women also declared more visiting populated public places than men (40.2% vs 24.2%, 20–39-year-old)

**Table 5: Knowledge on COVID-19 (Bamako, n=962, September 2020).**

| Questions (true/false/ don't know)                                                                                                         | Success (%) |
|--------------------------------------------------------------------------------------------------------------------------------------------|-------------|
| 1. The main clinical symptoms of the disease are dry cough, fever, tiredness and muscle pain (true)                                        | 65.0%       |
| 2. Unlike the common cold, blocked nose, runny nose and sneezing are not symptoms that are systematically associated with COVID-19. (true) | 42.7%       |
| 3. At present there is no treatment for COVID-19 but early treatment of symptoms can help patients recover (true)                          | 67.0%       |
| 4. Not all infected people will develop severe forms of the disease (true)                                                                 | 60.0%       |

|                                                                                                                                      |       |
|--------------------------------------------------------------------------------------------------------------------------------------|-------|
| 5. Older people, those with chronic illnesses and the obese are at greater risk of developing a severe form (true)                   | 65.2% |
| 6. Eating or touching wild animals can lead to infection (false)                                                                     | 16.7% |
| 7. People with the virus, if they do not have a fever, are not contagious and therefore cannot transmit COVID-19 to others (false)   | 30.6% |
| 8. COVID-19 is primarily transmitted by respiratory droplets from infected persons.(true)                                            | 70.5% |
| 9. Residents of epidemic areas can wear masks to prevent infection by the COVID-19 virus (true)                                      | 73.4% |
| 10. COVID-19 prevention measures do not apply to children and young adults. (false)                                                  | 37.2% |
| 11. To prevent COVID-19 infection, people should avoid going to populated places (mosques, markets, railway stations) (true)         | 72.7% |
| 12. Isolating infected people helps to reduce transmission of the virus (true)                                                       | 77.9% |
| 13. Any person in contact with an infected person should be isolated in a suitable place for an observation period of 14 days (true) | 80.2% |

Mean score (SD) one point by correct answer from 0 to 13 (13 items scale)

measure of internal consistency: Cronbach's alpha (0.73).

measure of validity (factor analysis): Kaiser-Meyer-Olkin (0.882); Barlett test ( $p < 0.001$ )

377

378

379

380

381

382

383

384

385

386 **Table 6a: Knowledge, attitudes, behaviors and practices toward COVID-19 among Bamako inhabitants (Bamako, n=962, September 2020)**

387

|                                                                                                                | 12-19 years old |       |         | 20-39 years old |              |                          |
|----------------------------------------------------------------------------------------------------------------|-----------------|-------|---------|-----------------|--------------|--------------------------|
|                                                                                                                | Men             | Women | p value | Men             | Women        | p value                  |
| <i>Attitudes/denials towards COVID-19 measured by agreement (agreed, very agreed) with following opinions:</i> |                 |       |         |                 |              |                          |
| • Is a god Punishment                                                                                          | 40.1%           | 41.7% | 0.702   | 41.2%           | 44.6%        | 0.591                    |
| • Has been introduced in Mali by the white people                                                              | 46.4%           | 43.6% | 0.487   | 48.5%           | 46.4%        | 0.749                    |
| • Is due to a spell                                                                                            | 14.9%           | 15.6% | 0.822   | 11.5%           | 14.3%        | 0.509                    |
| • Help politicians' strategy to take money from developed countries                                            | 33.8%           | 27.8% | 0.112   | <b>37.4%</b>    | <b>24.1%</b> | <b>0.026</b>             |
| <i>Systematic daily changes in behaviors reported from the start of COVID-19 pandemic:</i>                     |                 |       |         |                 |              |                          |
| • Washing hands                                                                                                | 27.5%           | 24.6% | 0.420   | 35.9%           | 35.7%        | 0.979                    |
| • Blowing into the elbow                                                                                       | 12.6%           | 8.4%  | 0.099   | 14.4%           | 14.4%        | 0.996                    |
| • Stop touching other people (systematically)                                                                  | 12.6%           | 15.2% | 0.353   | 14.4%           | 16.1%        | 0.716                    |
| • Traveling less frequently                                                                                    | 8.7%            | 9.8%  | 0.616   | 14.4%           | 13.4%        | 0.822                    |
| • Avoiding populated places                                                                                    | 7.2%            | 9.1%  | 0.389   | 13.0%           | 11.6%        | 0.746                    |
| • Avoiding seeing friends                                                                                      | 3.9%            | 5.7%  | 0.299   | 8.4%            | 11.6%        | 0.403                    |
| <i>At-risk practices during the seven past days declared:</i>                                                  |                 |       |         |                 |              |                          |
| • Wearing mask outside systematically or very often                                                            | 27.5%           | 24.2% | 0.361   | 32.8%           | 33.0%        | 0.972                    |
| • Visiting populated public places every day or very often                                                     | 31.4%           | 27.8% | 0.329   | <b>24.2%</b>    | <b>40.2%</b> | <b>0.008<sup>§</sup></b> |
| • Going out every night or very often                                                                          | 21.3%           | 17.5% | 0.250   | 13.0%           | 17.9%        | 0.291                    |
| • Washing hands when necessary                                                                                 | 59.1%           | 57.4% | 0.677   | 51.1%           | 56.3%        | 0.426                    |
| • Staying every day, or very often, more than two hours in a small closed space                                | 22.8%           | 22.4% | 0.926   | 20.5%           | 20.7%        | 0.959                    |
| • Had participated to social events every day or very often                                                    | 21.3%           | 21.6% | 0.921   | 18.9%           | 24.1%        | 0.326                    |

388 <sup>§</sup>significant, after Bonferroni correction

389

390



391 **Table 6b: Attitudes, behaviors and practices toward COVID-19 among Bamako inhabitants (Bamako, n=962, 2020)**

392

|                                                                                                                | 39-64 years old |              |              | >64 years old |              |              |
|----------------------------------------------------------------------------------------------------------------|-----------------|--------------|--------------|---------------|--------------|--------------|
|                                                                                                                | Men             | Women        | p value      | Men           | Women        | p value      |
| <i>Attitudes/denials towards COVID-19 measured by agreement (agreed, very agreed) with following opinions:</i> |                 |              |              |               |              |              |
| • Is a god Punishment                                                                                          | 41.2%           | 44.6%        | 0.591        | 55.1%         | 60.4%        | 0.596        |
| • Has been introduced in Mali by the white people                                                              | 48.5%           | 46.4%        | 0.749        | 38.8%         | 39.6%        | 0.935        |
| • Is due to a spell                                                                                            | 11.5%           | 14.3%        | 0.509        | 12.2%         | 12.8%        | 0.938        |
| • Help politicians' strategy to take money from developed countries                                            | <b>37.4%</b>    | <b>24.1%</b> | <b>0.026</b> | 24.5%         | 22.9%        | 0.855        |
| <i>Systematic daily changes in behaviors reported from the start of COVID-19 pandemic:</i>                     |                 |              |              |               |              |              |
| • Washing hands                                                                                                | 30.6%           | 41.7%        | 0.257        | 33.3%         | 33.3%        | 1.000        |
| • Blowing into the elbow                                                                                       | 24.5%           | 12.5%        | 0.129        | <b>46.7%</b>  | <b>0.0%</b>  | <b>0.015</b> |
| • Stop touching other people (systematically)                                                                  | 16.3%           | 22.9%        | 0.414        | 33.3%         | 11.1%        | 0.224        |
| • Traveling less frequently                                                                                    | 8.0%            | 20.8%        | 0.070        | 26.7%         | 0.0%         | 0.090        |
| • Avoiding populated places                                                                                    | 8.0%            | 14.6%        | 0.302        | 6.7%          | 11.1%        | 0.703        |
| • Avoiding seeing friends                                                                                      | 8.0%            | 12.5%        | 0.462        | 13.3%         | 0.0          | 0.253        |
| <i>At-risk practices during the seven past days declared:</i>                                                  |                 |              |              |               |              |              |
| • Wearing mask outside systematically or very often                                                            | 32.7%           | 37.5%        | 0.617        | 46.7%         | 44.4%        | 0.916        |
| • Visiting populated public places every day or very often                                                     | 40.8%           | 41.7%        | 0.932        | <b>0.0%</b>   | <b>30.0%</b> | <b>0.024</b> |
| • Going out every night or very often                                                                          | 28.6%           | 20.8%        | 0.377        | <b>0.0%</b>   | <b>30.0%</b> | <b>0.024</b> |
| • Washing hands when necessary                                                                                 | 40.8%           | 47.9%        | 0.482        | 33.3%         | 40.0%        | 0.734        |
| • Staying every day, or very often, more than two hours in a small closed space                                | 28.5%           | 25.0%        | 0.691        | 6.7%          | 30.0%        | 0.119        |
| • Had participated to social events every day or very often                                                    | 32.7%           | 27.1%        | 0.549        | 6.7%          | 22.2%        | 0.265        |

393 <sup>s</sup>significant, after Bonferroni correction

## Discussion

SARS-CoV-2 population adjusted seroprevalence in the urban commune VI of the Bamako district was 16.4%. This prevalence was much higher than the cumulative incidence reported by epidemiological surveillance since the beginning of the pandemic on the investigation site, which was 0.07% at the time of this survey (September 2020). It can be assumed that there was still active circulation of the virus in the capital city at the time of the surveys, suggested by the presence of IgM positive individuals. The corrected survey data suggest that a high number of SARS-CoV-2 infections occurred in the study site. Projected on the total population of Bamako, this prevalence would correspond to a total of 397,321 cases in September 2020. Mortality projections are crude but suggest that deaths caused by COVID-19 were also under-reported, with 81 reported for an estimated 1,720 expected deaths in Bamako in September 2020. The presence of IgM positive individuals suggests the persistence of active viral circulation at the time of the survey.

Seroprevalence was significantly lower in the Kenyan study, reporting 5.6% in a sample of 3,098 blood donors during the same period [15]. This study found a higher prevalence in urban cities and more widespread circulation of SARS-CoV-2 than reported by case-based surveillance. A similar study conducted in Kinshasa, Democratic Republic of Congo, in October-November 2020 after the first wave found a prevalence of 16.6%, a value close to that estimated here [7]. The differences between the different districts of the Congolese capital were not significant, as in the commune VI of Bamako. In Mali, Sagara *et al.* reported in the peri-urban area of Sotuba a crude seroprevalence of 13.1 % (n=587) across samples collected over a 2-month period after the first wave. But the subsequent study conducted in January 2021 in this peri-urban area showed an adjusted seroprevalence rate of 73.4%, after the second COVID-19 wave [6]. This sharp increase in the prevalence rate can be explained by a wave of intense transmission of COVID-19 related to alpha variant in Mali between November 2020 and January 2021 together with the increase of the screening capacity of the health services [4]. . Indeed, 3,258 new cases were officially reported at the Bamako district (and 172 new deaths) between November 1st 2020 and January 24 2021.

In our study, seropositivity was higher among women, with a predominance in the 20-40 age group. Conversely, in Senegal, a survey of the acceptability of the measures to fight the COVID-19 found a predominance of the 25-59 years age and male group [16]. Similarly, a literature review on seroprevalence among health workers worldwide found a seroprevalence of 8.2% in Africa with a male predominance [17]. This difference may be explained by the methodology of our study, which recruited only in households and during the day, *i.e.* working time: men aged 20 to 60 may be under-represented in our sample. We did not find any difference in symptomatology between COVID-19 positive and negative individuals during the last four months of the survey. This confirms the paucisymptomatic clinical situation of the disease.

The main demographic characteristics (age and gender) and proximity as a high potential contact rate (a household member already infected) remained significantly associated with seropositivity after adjusting for the contextual elements available. Although the household condition profile was not a significant determinant of seropositivity, the impact of infection among rich family units should be discussed (aOR 1.74 [0.99;3.07]). Indeed, poor families are more likely to live outdoors, to have lower ages, to have fewer co-morbidities (obesity, diabetes) in this population.

The age-related results were consistent with the epidemiological trends observed during the first wave of the epidemic worldwide: young people were less exposed than older one despite the higher level of risk practices, revealed by the KABP survey, and, as a result, were more reluctant to change their health behavior. According to psychological models of preventive behavior, self-perceived exposure is a key component of individual acceptability of preventive behavior change [18]. Nevertheless, hand

1  
2  
3 442 washing was a common practice, perhaps associated with former epidemic (e.g. Ebola in 2014), but  
4 443 not mask wearing, a little-know health practice in the Malian culture.  
5 444 Conversely, gender differences in outcomes remain problematic. Given the complexity of the  
6 445 relationship between sex, gender, and infectious disease [19], the updated medical literature reports  
7 446 greater vulnerability of men to COVID-19 than women due to gender-related social activities or  
8 447 comorbidities, but also due to significant sexual variations in the immune system [20, 21]. The  
9 448 vulnerability of women highlighted by our survey refers to a broader conception of the impact of SARS-  
10 449 CoV-2, including the carriage of the infection. However, with respect to the KABP survey results, with  
11 450 the exception of a tendency for women to score lower on knowledge of COVID-19, no significant  
12 451 statistical evidence emerged on an association between gender and health behaviors and risk  
13 452 practices. A possible selection bias in the serological survey could partly explain these results, but other  
14 453 hypotheses concerning the specific lifestyle and social position of West African women in light of  
15 454 exposure to infectious diseases need to be further explored. Furthermore, the results of multivariate  
16 455 analyses showing the role played by proximity in person-to-person transmission confirm that the  
17 456 spread of infectious diseases within the community involves a significant amount of within family  
18 457 transmissions due to asymptomatic transmission [22], particularly via children[23].  
19 458 A study on factors associated with the acceptability of government measures against COVID-19 in  
20 459 Senegal showed a correlation between education level and the proposed measures (inter-regional  
21 460 travel ban, curfew, closure of places of worship and closure of markets). But those with primary  
22 461 education and those with no education were likely to accept of curfews and less likely to accept inter-  
23 462 regional travel bans and the closure of places of worship [16].  
24 463 Finally, the trend of increasing positivity of the social indicator summarized in household profiles leads  
25 464 us to consider that understanding epidemic dynamics in populated cities involves taking into account  
26 465 the spatial structure of the population [24]. Additional evidence from geographic and socio-economic  
27 466 components [25, 26]), highlight the question of inequalities and individual vulnerability at each stage  
28 467 of the epidemic's spread: from dissemination including various factors such as household size [27],  
29 468 transmission of infection within the community to the associated societal consequences [28].  
30  
31  
32  
33  
34  
35  
36

## 37 470 **Conclusion**

38 471 In March 2022, 2 years after the pandemic onset and 4 epidemic waves, 30,398 confirmed cases (725  
39 472 associated deaths) were officially reported in Mali, 20,115 for the district of Bamako, and 60 health  
40 473 districts (among 75) reported cases. The Commune VI remains the most affected (or the most reporting  
41 474 cases) area with 5,712 reported cases. However, these reported numbers under-estimate the number  
42 475 of infected persons. The following waves involved variants, which were more aggressive and may also  
43 476 have led to a heavier death toll, and the consequences could be evaluated using revised prevalence  
44 477 and variant-adjusted infection fatality ratios. Conducted after the first wave, this study highlights the  
45 478 need for sufficient screening data to design efficient epidemic control strategies. Improving diagnostic  
46 479 capacities as well as awareness of populations, to encourage testing and preventive behaviors, as well  
47 480 as avoiding the spread of false information on the epidemic remain key pillars, not matter the  
48 481 developed or developing setting.  
49  
50  
51  
52

## 53 483 **List of abbreviations**

54 484 **IRD:** Institut de Recherche pour le Développement France

55 485 **RF:** Rich Family units

56 486 **PLF:** Poor Large Family units

57 487 **PSF:** Poor Small Family units

58 488 **SARS-CoV-2:** Severe Acute Respiratory Syndrome Coronavirus 2  
59  
60

1  
2  
3 489 **WHO:** World Health Organization  
4 490 **GAMM:** generalized additive multilevel models  
5 491 **KABP:** Knowledge, Attitudes, Behaviors and Practices  
6 492

## 493 **Declarations**

### 494 **Ethics approval and consent to participate**

11 495 The study was approved by the ethics committee of the Faculty of Medicine and Odontostomatology  
12 496 of Mali **N°2020/162/CE/FMOS/FAPH** and the Ministry of Health and Social Action **N° 001424 MASA-**  
13 497 **SG.**

14 498 A community agreement was first obtained from district leaders, local religious leaders, community  
15 499 associations and municipal authorities after explanation and discussion about the study protocol.  
16 500 Second, consents and/or assents of participants or their parent/guardian were obtained. The study  
17 501 team administered consent in local languages, and, if the participant or parent/guardian was not  
18 502 literate, in the presence of a witness. Individuals from each family consented separately.

20 503

### 21 504 **Consent for publication**

22 505 NA (no personal details/images/video in the manuscript)

### 24 506 **Availability of supporting data**

26 507 The data that support the findings of this study are available on reasonable request from the  
27 508 corresponding author, JG. The data are not publicly available due to confidentiality and ethical  
28 509 restrictions.

### 30 510 **Competing interests**

31 511 None declared

33 512

### 34 513 **Funding**

35 514 This study was funded by IRD (French National Research Institute for Sustainable Development); the  
36 515 JEAI DynaSTEC (Spatio-Temporal Dynamics of Epidemics and Environmental Changes research team);  
37 516 the French Embassy in Mali (field data collection) and the Charles Mérieux Foundation, Lyon  
38 517 (laboratory analyses); the NGO Prospective and Cooperation.

39 518 The funders had no role in the study design, data collection plan, analysis, decision to publish, or  
40 519 preparation of the manuscript.

42 520

### 43 521 **Author contributions**

44 522 JG and HB conceived and designed the study protocol, helped by JL, IS, MC, BK, IB, AG, OD, AD and  
45 523 MKBD. All the authors validated the study protocol.

46 524 MKBD wrote the household and KABP questionnaires, with the help of JL, MC, JG and IS.

47 525 MC, AKS and IS organized and supervised the samples and data collections, performed by AK, SS, ZD,  
48 526 CD, IT, ST, HM.

49 527 ST and IT were in charge of the information system under the supervision of IS.

50 528 JL, MKBD, MC and JG conceived and designed the data analysis. JL, MKBD and MC performed the data  
51 529 management and analysis.

52 530 BK and AKS designed and supervised the serological analysis, performed by HM, ES, KC.

53 531 JL, MKBD, MC and JG wrote the paper, corrected by all authors.

54 532 All authors participated to the manuscript and approved its last version.

55 533

### 56 534 **Acknowledgements**

535 We acknowledge the populations of the Commune VI, Bamako, the community health association, and  
536 all the community leaders.

537

## 538 Authors' information

539

540 **Mady Cissoko** [madycissoko@ymail.com](mailto:madycissoko@ymail.com); Malaria Research and Training Center, Université des  
541 Sciences, Techniques et Technologies, Bamako, Mali

542 **Jordi LANDIER** [jordi.landier@ird.fr](mailto:jordi.landier@ird.fr); IRD, INSERM, Aix Marseille Univ, SESSTIM, ISSPAM, Marseille,  
543 France

544 **bourema Kouriba** [bourema.kouriba@cicm-mali.org](mailto:bourema.kouriba@cicm-mali.org); Centre d'Infectiologie Clinique Charles Mérieux,  
545 Bamako, Mali

546 **Abdoul Karim Sangare** [sangareak@icermali.org](mailto:sangareak@icermali.org); Centre d'Infectiologie Clinique Charles Mérieux,  
547 Bamako, Mali

548 **Abdoulaye Katile** [katile@icermali.org](mailto:katile@icermali.org); Malaria Research and Training Center, Université des Sciences,  
549 Techniques et Technologies, Bamako, Mali

550 **Abdoulaye Djimde** [adjimde@icermali.org](mailto:adjimde@icermali.org); Malaria Research and Training Center, Université des  
551 Sciences, Techniques et Technologies, Bamako, Mali

552 **Ibrahima Berthe** [berthe\\_enet@hotmail.com](mailto:berthe_enet@hotmail.com); Direction générale de la santé et de l'hygiène publique  
553 du ministère de la santé et du développement social, Bamako, Mali

554 **Siriman Traoré** [straore@icermali.org](mailto:straore@icermali.org); Malaria Research and Training Center, Université des Sciences,  
555 Techniques et Technologies, Bamako, Mali

556 **Ismaila Thera** [ithera@icermali.org](mailto:ithera@icermali.org); Malaria Research and Training Center, Université des Sciences,  
557 Techniques et Technologies, Bamako, Mali

558 **Hadiata Maiga** [hadiata.berthe@cicm-mali.org](mailto:hadiata.berthe@cicm-mali.org); Centre d'Infectiologie Clinique Charles Mérieux,  
559 Bamako, Mali

560 **Elisabeth Sogodogo** [elisabeth.sogodogo@cicm-mali.org](mailto:elisabeth.sogodogo@cicm-mali.org); Centre d'Infectiologie Clinique Charles  
561 Mérieux, Bamako, Mali

562 **Karyn Coulibaly** [karinitonyowacoul@gmail.com](mailto:karinitonyowacoul@gmail.com); Centre d'Infectiologie Clinique Charles Mérieux,  
563 Bamako, Mali

564 **Abdoulaye Guindo** [abdouguindo@yahoo.fr](mailto:abdouguindo@yahoo.fr); Direction générale de la santé et de l'hygiène publique  
565 du ministère de la santé et du développement social, Bamako, Mali

566 **Ousmane Dembelé** [ousma66@yahoo.fr](mailto:ousma66@yahoo.fr); Direction générale de la santé et de l'hygiène publique du  
567 ministère de la santé et du développement social, Bamako, Mali

568 **Souleymane Sanogo** [ssanogo24@yahoo.fr](mailto:ssanogo24@yahoo.fr); Direction régionale de Tombouctou et établissement  
569 public hospitalier de Tombouctou, Tombouctou, Mali

570 **Zoumana Dombia** [zoumana.dombia@yahoo.fr](mailto:zoumana.dombia@yahoo.fr); Direction régionale de Tombouctou et  
571 établissement public hospitalier de Tombouctou, Tombouctou, Mali

572 **Charles Dara** [darafmposfac@yahoo.fr](mailto:darafmposfac@yahoo.fr); Direction régionale de Tombouctou et établissement public  
573 hospitalier de Tombouctou, Tombouctou, Mali

574 **Mathias Altmann** [mathias.altmann@u-bordeaux.fr](mailto:mathias.altmann@u-bordeaux.fr); INSERM, IRD, Bordeaux Population Health,  
575 Bordeaux, France

576 **Emmanuel Bonnet** [emmanuel.bonnet@ird.fr](mailto:emmanuel.bonnet@ird.fr); IRD, Unité resiliance, Paris, France

577 **Hubert Baliq** [hubertbaliq@hotmail.com](mailto:hubertbaliq@hotmail.com); Direction générale de la santé et de l'hygiène publique  
578 du ministère de la santé et du développement social, Bamako, Mali

579 **Luis Sagaon-Teyssier** [luis.sagaon-teyssier@ird.fr](mailto:luis.sagaon-teyssier@ird.fr); IRD, INSERM, Aix Marseille Univ, SESSTIM, ISSPAM,  
580 Marseille, France & ARCAD Santé Plus / Centre Intégré de Recherche, de Soins et d'Action  
581 Communautaire (CIRSAC), Bamako, Mali

582 **Laurent Vidal** [laurent.vidal@ird.fr](mailto:laurent.vidal@ird.fr); IRD, INSERM, Aix Marseille Univ, SESSTIM, ISSPAM, Marseille,  
583 France

584 **Issaka Sagara** [isagara@icermali.org](mailto:isagara@icermali.org); Malaria Research and Training Center, Université des Sciences,  
585 Techniques et Technologies, Bamako, Mali

1  
2  
3 586 **Marc-Karim Bendiane** [marc-karim.bendiane@inserm.fr](mailto:marc-karim.bendiane@inserm.fr); IRD, INSERM, Aix Marseille Univ, SESSTIM,  
4 587 ISSPAM, Marseille, France  
5 588 **Jean Gaudart** [jean.gaudart@univ-amu.fr](mailto:jean.gaudart@univ-amu.fr); IRD, INSERM, Aix Marseille Univ, SESSTIM, ISSPAM,  
6 589 Marseille, AP-HM, Hopital La Timone, BioSTIC, Biostatistics and Modeling unit, France  
7  
8 590  
9 591

## 10 References

- 11 593 1. Dhama K, Khan S, Tiwari R, Sircar S, Bhat S, Malik YS, et al. Coronavirus Disease 2019–COVID-19.  
12 594 Clin Microbiol Rev. 2020;33:e00028-20.
- 14 595 2. Van Damme W, Dahake R, Delamou A, Ingelbeen B, Wouters E, Vanham G, et al. The COVID-19  
15 596 pandemic: diverse contexts; different epidemics-how and why? BMJ Glob Health. 2020;5:e003098.
- 17 597 3. Bonnet E, Bodson O, Le Marcis F, Faye A, Sambieni NE, Fournet F, et al. The COVID-19 pandemic in  
18 598 francophone West Africa: from the first cases to responses in seven countries. BMC Public Health.  
19 599 2021;21:1490.
- 21 600 4. INSP Mali. Rapport Institut Nationa de la Santé Publique Mali. 2020.
- 23 601 5. Moraga P, Ketcheson DI, Ombao HC, Duarte CM. Assessing the age- and gender-dependence of the  
24 602 severity and case fatality rates of COVID-19 disease in Spain. Wellcome Open Res. 2020;5:117.
- 26 603 6. Sagara I, Woodford J, Kone M, Assadou MH, Katile A, Attaher O, et al. Rapidly increasing SARS-CoV-  
27 604 2 seroprevalence and limited clinical disease in three Malian communities: a prospective cohort  
28 605 study. Clin Infect Dis. 2021.
- 30 606 7. Nkuba AN, Makiala SM, Guichet E, Tshiminyi PM, Bazitama YM, Yambayamba MK, et al. High  
31 607 prevalence of anti-SARS-CoV-2 antibodies after the first wave of COVID-19 in Kinshasa, Democratic  
32 608 Republic of the Congo: results of a cross-sectional household-based survey. Clin Infect Dis. 2021.
- 34 609 8. World Health Organization. Population-based age-stratified seroepidemiological investigation  
35 610 protocol for COVID-19 virus infection, 17 March 2020. World Health Organization; 2020.
- 37 611 9. Bennett S, Radalowicz A, Vella V, Tomkins A. A computer simulation of household sampling  
38 612 schemes for health surveys in developing countries. Int J Epidemiol. 1994;23:1282–91.
- 40 613 10. BIOMÉRIEUX SA. BioMérieux | VIDAS® SARS-COV-2. [https://go.biomerieux.com/SEROLOGIE-](https://go.biomerieux.com/SEROLOGIE-VIDAS-SARS-COV-2)  
41 614 [VIDAS-SARS-COV-2](https://go.biomerieux.com/SEROLOGIE-VIDAS-SARS-COV-2). Accessed 16 May 2022.
- 43 615 11. The Novel Coronavirus Pneumonia Emergency Response Epidemiology Team. The  
44 616 Epidemiological Characteristics of an Outbreak of 2019 Novel Coronavirus Diseases (COVID-19) —  
45 617 China, 2020. China CDC Wkly. 2020;2:113–22.
- 47 618 12. Lê S, Josse J, Husson F. FactoMineR: An R Package for Multivariate Analysis. J Stat Softw.  
48 619 2008;25:1–18.
- 50 620 13. Kim J, Zhang Y, Day J, Zhou H. MGLM: An R Package for Multivariate Categorical Data Analysis. R J.  
51 621 2018;10:73–90.
- 53 622 14. Simon N Wood. generalized Additive Models : An introduction with R. 2006;392.
- 55 623 15. Uyoga S, Adetifa IMO, Karanja HK, Nyagwange J, Tuju J, Wanjiku P, et al. Seroprevalence of anti-  
56 624 SARS-CoV-2 IgG antibodies in Kenyan blood donors. Science. 2021;371:79–82.

- 1  
2  
3 625 16. Diallo AI, Faye A, Tine JAD, Ba MF, Gaye I, Bonnet E, et al. Factors associated with the  
4 626 acceptability of government measures to address COVID-19 in Senegal. *Rev D'Épidémiologie Santé*  
5 627 *Publique*. 2022. <https://doi.org/10.1016/j.respe.2022.03.123>.  
6  
7 628 17. Naranbhai V, Chang CC, Beltran WFG, Miller TE, Astudillo MG, Villalba JA, et al. High  
8 629 Seroprevalence of Anti-SARS-CoV-2 Antibodies in Chelsea, Massachusetts. *J Infect Dis*.  
9 630 2020;222:1955–9.  
11 631 18. Malloy TE, Fisher WA, Albright L, Misovich SJ, Fisher JD. Interpersonal perception of the AIDS risk  
12 632 potential of persons of the opposite sex. *Health Psychol Off J Div Health Psychol Am Psychol Assoc*.  
13 633 1997;16:480–6.  
15 634 19. Gay L, Melenotte C, Lakbar I, Mezouar S, Devaux C, Raoult D, et al. Sexual Dimorphism and  
16 635 Gender in Infectious Diseases. *Front Immunol*. 2021;12.  
18 636 20. Tazerji SS, Shahabinejad F, Tokasi M, Rad MA, Khan MS, Safdar M, et al. Global data analysis and  
19 637 risk factors associated with morbidity and mortality of COVID-19. *Gene Rep*. 2022;26:101505.  
21 638 21. Bienvenu LA, Noonan J, Wang X, Peter K. Higher mortality of COVID-19 in males: sex differences  
22 639 in immune response and cardiovascular comorbidities. *Cardiovasc Res*. 2020;:cvaa284.  
24 640 22. Ravindra K, Malik VS, Padhi BK, Goel S, Gupta M. Asymptomatic infection and transmission of  
25 641 COVID-19 among clusters: systematic review and meta-analysis. *Public Health*. 2022;203:100–9.  
27 642 23. Song W-L, Zou N, Guan W-H, Pan J-L, Xu W. Clinical characteristics of COVID-19 in family clusters:  
28 643 a systematic review. *World J Pediatr WJP*. 2021;17:355–63.  
30 644 24. Rader B, Scarpino SV, Nande A, Hill AL, Adlam B, Reiner RC, et al. Crowding and the shape of  
31 645 COVID-19 epidemics. *Nat Med*. 2020;26:1829–34.  
33 646 25. Markovič R, Šterk M, Marhl M, Perc M, Gosak M. Socio-demographic and health factors drive the  
34 647 epidemic progression and should guide vaccination strategies for best COVID-19 containment.  
35 648 *Results Phys*. 2021;26:104433.  
37 649 26. Fortaleza CMCB, Guimarães RB, de Almeida GB, Pronunciate M, Ferreira CP. Taking the inner  
38 650 route: spatial and demographic factors affecting vulnerability to COVID-19 among 604 cities from  
39 651 inner São Paulo State, Brazil. *Epidemiol Infect*. 2020;148:e118.  
41 652 27. Martin CA, Jenkins DR, Minhas JS, Gray LJ, Tang J, Williams C, et al. Socio-demographic  
42 653 heterogeneity in the prevalence of COVID-19 during lockdown is associated with ethnicity and  
43 654 household size: Results from an observational cohort study. *EClinicalMedicine*. 2020;25:100466.  
45 655 28. Zhang Y, Wang L, Zhu JJH, Wang X. The spatial dissemination of COVID-19 and associated socio-  
46 656 economic consequences. *J R Soc Interface*. 2022;19:20210662.  
48 657  
49  
50  
51  
52  
53  
54  
55  
56  
57  
58  
59  
60

1  
2  
3  
4  
5  
6  
7  
8  
9  
10  
11  
12  
13  
14  
15  
16  
17  
18  
19  
20  
21  
22  
23  
24  
25  
26  
27  
28  
29  
30  
31  
32  
33  
34  
35  
36  
37  
38  
39  
40  
41  
42  
43  
44  
45  
46  
47  
48  
49  
50  
51  
52  
53  
54  
55  
56  
57  
58  
59  
60

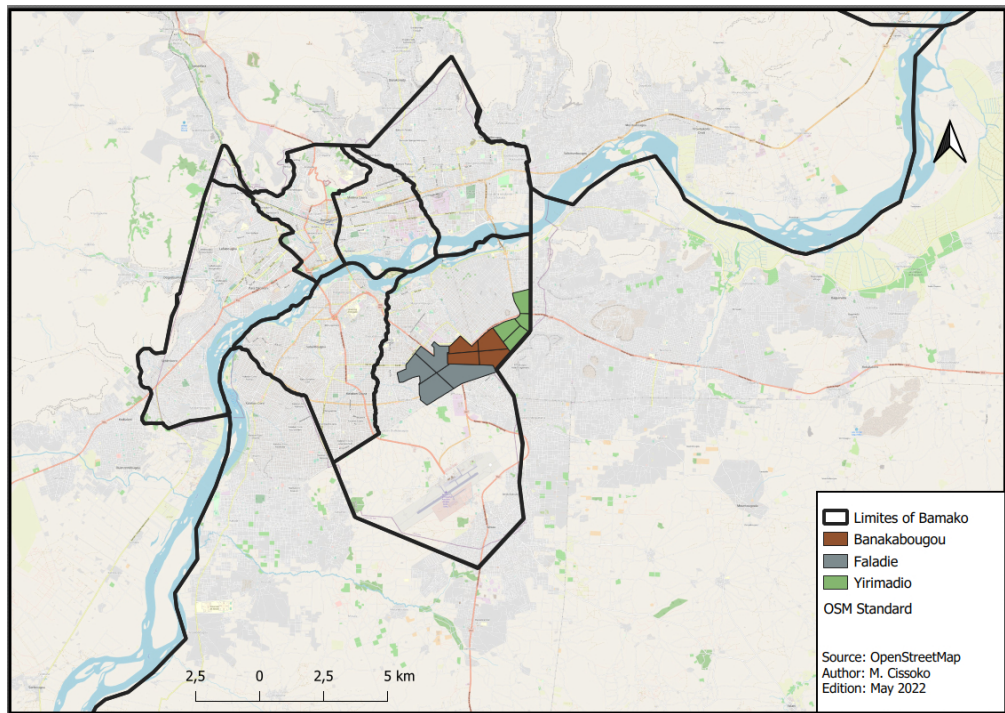

501x356mm (57 x 57 DPI)



1  
2  
3  
4  
5  
6  
7  
8  
9  
10  
11  
12  
13  
14  
15  
16  
17  
18  
19  
20  
21  
22  
23  
24  
25  
26  
27  
28  
29  
30  
31  
32  
33  
34  
35  
36  
37  
38  
39  
40  
41  
42  
43  
44  
45  
46  
47  
48  
49  
50  
51  
52  
53  
54  
55  
56  
57  
58  
59  
60

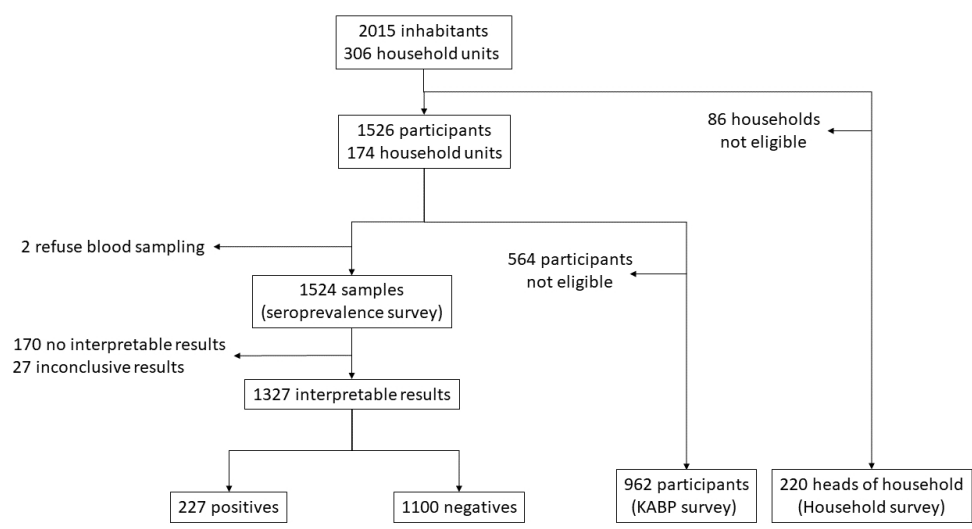

855x481mm (38 x 38 DPI)

1  
2  
3  
4  
5  
6  
7  
8  
9  
10  
11  
12  
13  
14  
15  
16  
17  
18  
19  
20  
21  
22  
23  
24  
25  
26  
27  
28  
29  
30  
31  
32  
33  
34  
35  
36  
37  
38  
39  
40  
41  
42  
43  
44  
45  
46  
47  
48  
49  
50  
51  
52  
53  
54  
55  
56  
57  
58  
59  
60

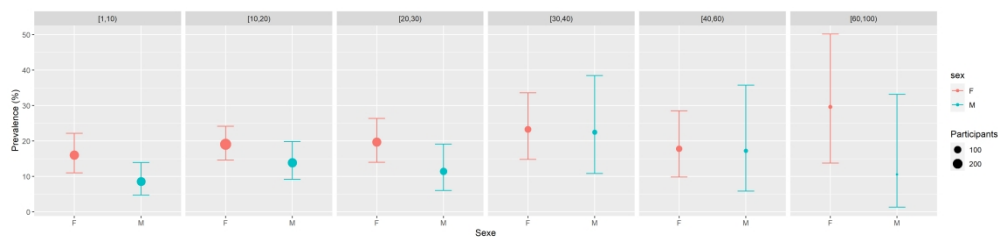

1097x258mm (118 x 118 DPI)

# BMJ Open

## SARS-CoV-2 seroprevalence and living conditions in Bamako (Mali): a cross-sectional multistage household survey after the first epidemic wave, 2020

|                               |                                                                                                                                                                                                                                                                                                                                                                                                                                                                                                                                                                                                                                                                                                                                                                                                                                                                                                                                                                                                                                                                                                                                                                                                                                                                                                                                                                                                                                                                                                                                                                                                                                                                                                                                                                                                                                                                                                                                                                                                                                                                                                                                                                                                                                                                           |
|-------------------------------|---------------------------------------------------------------------------------------------------------------------------------------------------------------------------------------------------------------------------------------------------------------------------------------------------------------------------------------------------------------------------------------------------------------------------------------------------------------------------------------------------------------------------------------------------------------------------------------------------------------------------------------------------------------------------------------------------------------------------------------------------------------------------------------------------------------------------------------------------------------------------------------------------------------------------------------------------------------------------------------------------------------------------------------------------------------------------------------------------------------------------------------------------------------------------------------------------------------------------------------------------------------------------------------------------------------------------------------------------------------------------------------------------------------------------------------------------------------------------------------------------------------------------------------------------------------------------------------------------------------------------------------------------------------------------------------------------------------------------------------------------------------------------------------------------------------------------------------------------------------------------------------------------------------------------------------------------------------------------------------------------------------------------------------------------------------------------------------------------------------------------------------------------------------------------------------------------------------------------------------------------------------------------|
| Journal:                      | <i>BMJ Open</i>                                                                                                                                                                                                                                                                                                                                                                                                                                                                                                                                                                                                                                                                                                                                                                                                                                                                                                                                                                                                                                                                                                                                                                                                                                                                                                                                                                                                                                                                                                                                                                                                                                                                                                                                                                                                                                                                                                                                                                                                                                                                                                                                                                                                                                                           |
| Manuscript ID                 | bmjopen-2022-067124.R1                                                                                                                                                                                                                                                                                                                                                                                                                                                                                                                                                                                                                                                                                                                                                                                                                                                                                                                                                                                                                                                                                                                                                                                                                                                                                                                                                                                                                                                                                                                                                                                                                                                                                                                                                                                                                                                                                                                                                                                                                                                                                                                                                                                                                                                    |
| Article Type:                 | Original research                                                                                                                                                                                                                                                                                                                                                                                                                                                                                                                                                                                                                                                                                                                                                                                                                                                                                                                                                                                                                                                                                                                                                                                                                                                                                                                                                                                                                                                                                                                                                                                                                                                                                                                                                                                                                                                                                                                                                                                                                                                                                                                                                                                                                                                         |
| Date Submitted by the Author: | 11-Jan-2023                                                                                                                                                                                                                                                                                                                                                                                                                                                                                                                                                                                                                                                                                                                                                                                                                                                                                                                                                                                                                                                                                                                                                                                                                                                                                                                                                                                                                                                                                                                                                                                                                                                                                                                                                                                                                                                                                                                                                                                                                                                                                                                                                                                                                                                               |
| Complete List of Authors:     | <p>Cissoko, Mady; IRD, INSERM, Aix Marseille Univ, SESSTIM, ISSPAM, Marseille, France; Malaria Research and Training Center, Parasitologie Landier, Jordi; IRD, INSERM, Aix Marseille Univ, SESSTIM, ISSPAM, Marseille, France, SESSTIM UMR1252</p> <p>Kouriba, Bourema; Centre d'Infectiologie Clinique Charles Mérieux, Bamako, Mali</p> <p>Sangare, Abdoul; Centre d'Infectiologie Clinique Charles Mérieux, Bamako, Mali</p> <p>Katilé , Abdoulaye; Malaria Research and Training Centre Ogobara K. Doumbo (MRTC-OKD), FMOS-FAPH, Mali-NIAID-ICER, Université des Sciences, des Techniques et des Technologies de Bamako, 1805 Bamako, Mali; Aix Marseille Univ, INSERM, IRD, ISSPAM, UM1252, 13005 Marseille, France</p> <p>Djimde, Abdoulaye A.; Malaria Research and Training Center, Université des Sciences, Techniques et Technologies, Bamako, Mali</p> <p>Berthé , Ibrahima ; Malaria Research and Training Centre Ogobara K. Doumbo (MRTC-OKD), FMOS-FAPH, Mali-NIAID-ICER, Université des Sciences, des Techniques et des Technologies de Bamako, 1805 Bamako, Mali; Direction générale de la santé et de l'hygiène publique du ministère de la santé et du développement social, Bamako, Mali</p> <p>Traore, Siriman; Malaria Research and Training Center, Université des Sciences, Techniques et Technologies, Bamako, Mali</p> <p>Thera, Ismaila; Malaria Research and Training Center, Université des Sciences, Techniques et Technologies, Bamako, Mali</p> <p>Hadiata, Maiga; Centre d'Infectiologie Clinique Charles Mérieux, Bamako, Mali</p> <p>Sogodogo, Elisabeth; Centre d'Infectiologie Clinique Charles Mérieux, Bamako, Mali</p> <p>Coulibaly, Karyn; Centre d'Infectiologie Clinique Charles Mérieux, Bamako, Mali</p> <p>Guindo, Abdoulaye; Direction générale de la santé et de l'hygiène publique du ministère de la santé et du développement social, Bamako, Mali</p> <p>Dembele, Ousmane; Direction générale de la santé et de l'hygiène publique du ministère de la santé et du développement social, Bamako, Mali</p> <p>Sanogo, Souleymane; Direction régionale de Tombouctou et établissement public hospitalier de Tombouctou, Tombouctou, Mali</p> <p>Doumbia, Zoumana; Direction régionale de Tombouctou et établissement</p> |

|                                 |                                                                                                                                                                                                                                                                                                                                                                                                                                                                                                                                                                                                                                                                                                                                                                                                                                                                                                                                                                                                                                                                                                                            |
|---------------------------------|----------------------------------------------------------------------------------------------------------------------------------------------------------------------------------------------------------------------------------------------------------------------------------------------------------------------------------------------------------------------------------------------------------------------------------------------------------------------------------------------------------------------------------------------------------------------------------------------------------------------------------------------------------------------------------------------------------------------------------------------------------------------------------------------------------------------------------------------------------------------------------------------------------------------------------------------------------------------------------------------------------------------------------------------------------------------------------------------------------------------------|
|                                 | public hospitalier de Tombouctou, Tombouctou, Mali<br>Dara, Charles; Direction régionale de Tombouctou et établissement public hospitalier de Tombouctou, Tombouctou, Mali<br>Altmann, Mathias; INSERM, IRD, Bordeaux Population Health, Bordeaux, France<br>Bonnet, Emmanuel ; Institut de recherche pour le développement, Résiliences<br>Balique, Hubert; Direction générale de la santé et de l'hygiène publique du ministère de la santé et du développement social, Bamako, Mali<br>Sagaon-Teyssier, Luis; IRD, INSERM, Aix Marseille Univ, SESSTIM, ISSPAM, Marseille, France; ARCAD Santé Plus / Centre Intégré de Recherche, de Soins et d'Action Communautaire (CIRSAC), Bamako, Mali<br>Vidal, Laurent; SESSTIM<br>Sagara, Issaka; Université des Sciences des Techniques et des Technologies de Bamako, Malaria Research and Training Center (MRTC)<br>Bendiane, Marc-Karim; IRD, INSERM, Aix Marseille Univ, SESSTIM, ISSPAM, Marseille, France<br>Gaudart, Jean; Aix-Marseille Université, IRD, INSERM, Aix Marseille Univ, SESSTIM, ISSPAM,; Assistance Publique Hôpitaux de Marseille, Biostatistics & ICT |
| <b>Primary Subject Heading</b>: | Epidemiology                                                                                                                                                                                                                                                                                                                                                                                                                                                                                                                                                                                                                                                                                                                                                                                                                                                                                                                                                                                                                                                                                                               |
| Secondary Subject Heading:      | Epidemiology, Infectious diseases, Public health                                                                                                                                                                                                                                                                                                                                                                                                                                                                                                                                                                                                                                                                                                                                                                                                                                                                                                                                                                                                                                                                           |
| Keywords:                       | COVID-19, EPIDEMIOLOGY, Tropical medicine < INFECTIOUS DISEASES                                                                                                                                                                                                                                                                                                                                                                                                                                                                                                                                                                                                                                                                                                                                                                                                                                                                                                                                                                                                                                                            |
|                                 |                                                                                                                                                                                                                                                                                                                                                                                                                                                                                                                                                                                                                                                                                                                                                                                                                                                                                                                                                                                                                                                                                                                            |

SCHOLARONE™  
Manuscripts



I, the Submitting Author has the right to grant and does grant on behalf of all authors of the Work (as defined in the below author licence), an exclusive licence and/or a non-exclusive licence for contributions from authors who are: i) UK Crown employees; ii) where BMJ has agreed a CC-BY licence shall apply, and/or iii) in accordance with the terms applicable for US Federal Government officers or employees acting as part of their official duties; on a worldwide, perpetual, irrevocable, royalty-free basis to BMJ Publishing Group Ltd ("BMJ") its licensees and where the relevant Journal is co-owned by BMJ to the co-owners of the Journal, to publish the Work in this journal and any other BMJ products and to exploit all rights, as set out in our [licence](#).

The Submitting Author accepts and understands that any supply made under these terms is made by BMJ to the Submitting Author unless you are acting as an employee on behalf of your employer or a postgraduate student of an affiliated institution which is paying any applicable article publishing charge ("APC") for Open Access articles. Where the Submitting Author wishes to make the Work available on an Open Access basis (and intends to pay the relevant APC), the terms of reuse of such Open Access shall be governed by a Creative Commons licence – details of these licences and which [Creative Commons](#) licence will apply to this Work are set out in our licence referred to above.

Other than as permitted in any relevant BMJ Author's Self Archiving Policies, I confirm this Work has not been accepted for publication elsewhere, is not being considered for publication elsewhere and does not duplicate material already published. I confirm all authors consent to publication of this Work and authorise the granting of this licence.

# 1 SARS-CoV-2 seroprevalence and living conditions in Bamako (Mali): a cross- 2 sectional multistage household survey after the first epidemic wave, 2020

3  
4  
5  
6  
7 4 Mady Cissoko<sup>1,2,5\*</sup>, Jordi Landier<sup>1\*</sup>, Bourema Kouriba<sup>3\*</sup>, Abdoul Karim Sangare<sup>3</sup>, Abdoulaye Katile<sup>1,2</sup>,  
8 Abdoulaye Djimdé<sup>2</sup>, Ibrahima Berthé<sup>4</sup>, Siriman Traoré<sup>2</sup>, Ismaïla Thera<sup>2</sup>, Hadiata Maiga<sup>3</sup>, Elisabeth  
9 Sogodogo<sup>3</sup>, Karyn Coulibaly<sup>3</sup>, Abdoulaye Guindo<sup>4</sup>, Ousmane Dembelé<sup>4</sup>, Souleymane Sanogo<sup>5</sup>, Zoumana  
10 Doumbia<sup>5</sup>, Charles Dara<sup>5</sup>, Mathias Altmann<sup>6</sup>, Emmanuel Bonnet<sup>7</sup>, Hubert Balique<sup>4</sup>, Luis Sagaon-  
11 Teyssier<sup>1,8</sup>, Laurent Vidal<sup>1</sup>, Issaka Sagara<sup>2§</sup>, Marc-Karim Bendiane<sup>1§</sup>, Jean Gaudart<sup>1,2,9§</sup>

12  
13  
14 10 1 IRD, INSERM, Aix Marseille Univ, SESSTIM, ISSPAM, Marseille, France

15 11 2 Malaria Research and Training Center, Université des Sciences, Techniques et Technologies, Bamako,  
16 12 Mali

17 13 3 Centre d'Infectiologie Clinique Charles Mérieux, Bamako, Mali

18 14 4 Direction générale de la santé et de l'hygiène publique du ministère de la santé et du développement  
19 15 social, Bamako, Mali

20 16 5 Direction régionale de Tombouctou et établissement public hospitalier de Tombouctou,  
21 17 Tombouctou, Mali

22 18 6 INSERM, IRD, Bordeaux Population Health, Bordeaux, France

23 19 7 IRD, Unité Resilience, Paris, France

24 20 8 ARCAD Santé Plus / Centre Intégré de Recherche, de Soins et d'Action Communautaire (CIRSAC),  
25 21 Bamako, Mali

26 22 9 AP-HM, Hopital La Timone, BioSTIC, Biostatistics and Modeling unit, Marseille, France

27 23  
28 24 \* contributed equally and sharing co-first authorship

29 25 § contributed equally and sharing co-last authorship

30 26 Corresponding author: Jean Gaudart

31 27 Aix Marseille Univ, IRD, INSERM, SESSTIM, ISSPAM, AP-HM, Hopital La Timone, BioSTIC, Biostatistics  
32 28 and Modeling unit, Marseille, France

33 29 [Jean.gaudart@univ-amu.fr](mailto:Jean.gaudart@univ-amu.fr)

## 34 30 35 31 **Abstract**

### 36 32 **Objectives**

37 33 In low-income settings with limited access to diagnosis, COVID-19 information is scarce. In September  
38 34 2020, after the first COVID-19 wave, Mali reported 3,086 confirmed cases and 130 deaths. Most  
39 35 reports originated from Bamako, with 1,532 cases and 81 deaths (2.42 million inhabitants). This  
40 36 observed prevalence of 0.06% appeared very low. Our objective was to estimate SARS-CoV-2 infection  
41 37 among inhabitants of Bamako, after the first epidemic wave. We assessed demographic, social and  
42 38 living conditions, health behaviors and knowledges associated with SARS-CoV-2 seropositivity.

### 43 39 44 40 **Settings**

45 41 We conducted a cross-sectional multistage household survey during September 2020, in three  
46 42 neighborhoods of the commune VI (Bamako), where 30% of the cases were reported.

### 47 43 48 44 **Participants**

49 45 We recruited 1,526 inhabitants in 3 areas, *i.e.* 306 households, and 1,327 serological results ( $\geq 1$  years),  
50 46 220 household questionnaires and collected answers for 962 participants ( $\geq 12$  years).

### 51 47 52 48 **Primary and secondary outcome measures**

1  
2  
3 49 We measured serological status, detecting SARS-CoV-2 spike protein antibodies in blood sampled. We  
4 50 documented housing conditions and individual health behaviors through questionnaires among  
5 51 participants. We estimated the number of SARS-CoV-2 infections and deaths in the population of  
6 52 Bamako using the age and sex distributions.  
7

8 53

## 9 54 **Results**

10 55 The prevalence of SARS-CoV-2 seropositivity was 16.4% CI95%(15.1; 19.1) after adjusting on the  
11 56 population structure. This suggested that ~400,000 cases and ~2,000 deaths could have occurred of  
12 57 which only 0.4% of cases and 5% of deaths were officially reported. Questionnaires analyses suggested  
13 58 strong agreement with washing hands but lower acceptability of movement restrictions  
14 59 (lockdown/curfew), and mask wearing.  
15 60

16 60

## 17 61 **Conclusions**

18 62 The first wave of SARS-CoV-2 spread broadly in Bamako. Expected fatalities remained limited largely  
19 63 due to the population age structure and the low prevalence of comorbidities. Improving diagnostic  
20 64 capacities to encourage testing and preventive behaviors, and avoiding the spread of false information  
21 65 remain key pillars, regardless of the developed or developing setting.  
22 66

23 66

## 24 67 **Registration number**

25 68 This study was registered in the registry of the ethics committee of the Faculty of Medicine and  
26 69 Odonto-Stomatology and the Faculty of Pharmacy, Bamako, Mali, under the number:  
27 70 2020/162/CA/FMOS/FAPH.  
28 71

29 71

30 72 **Keywords:** COVID-19, sero-prevalence, living conditions, knowledge attitude behavior and practice.  
31 73  
32 73  
33 73

## 34 74 **Strengths and limitations of this study**

- 35 75
- 36 76 • A multi-stage cross-sectional survey was set up within the most affected health district of  
37 77 Bamako, the capital city, Mali, after the first wave of COVID-19
  - 38 78 • In addition to the blood sampling for SARS-CoV-2 serology, the survey collected information  
39 79 on household living conditions and participants' knowledges, attitudes, behaviors and  
40 80 practices
  - 41 81 • A multilevel generalized additive logistic model was performed to estimate the factors  
42 82 associated to SARS-CoV-2 seropositivity
  - 43 83 • Seroprevalence monitoring over time was not possible, and it was not possible to include all  
44 84 the districts of Bamako in the study.
- 45 83  
46 84  
47 84  
48  
49  
50  
51  
52  
53  
54  
55  
56  
57  
58  
59  
60

## Background

COVID-19 disease, due to the Severe Acute Respiratory Syndrome Coronavirus 2 (SARS-CoV-2), which emerged at the end of 2019 in Wuhan, China, has spread rapidly around the world and was declared as "pandemic" on 11 March 2020 by the World Health Organization (WHO) [1]. Despite setting up public health policies appropriated to this pandemic situation, such as lockdown, quarantine and curfew, the virus continues to circulate [2, 3]. The WHO African Region reported the least number of affected people since the pandemic began. Indeed, in many resource-limited settings, biological confirmation was only available in tertiary medical facilities and has been reserved for symptomatic patients (mostly severe) and/or travelers, the various national policies requiring a negative test for travel. As a result, the number of people exposed to the virus in Sub-Saharan Africa is still largely unknown [1].

After the first reported case on March 25<sup>th</sup> 2020 (coming from France on March 12<sup>th</sup>), Mali has recorded, 6 months later (at the time of the survey), 3,086 cases of SARS-CoV-2 diagnosed by RT-PCR, *i.e.* an incidence rate of 0.015% for the whole country. Spread over 38 health districts (among 75), they led 130 reported deaths, *i.e.* a case fatality rate of 4.2%[4].

Among the cases recorded in September 2020, ~50% were reported in the district of Bamako *i.e.* 1,532 reported cases, for a population of at least 2.42 million inhabitants. The most affected area was the Commune VI with 466 reported cases and 27 associated deaths. The second largest number of recorded cases was reported in the region of Timbuktu, with 572 confirmed cases at 6 months after the onset of the epidemic [4].

Given the limited access to diagnosis and care, and in the absence of a reliable syndromic surveillance, the low number of reported cases did not allow to assess accurately the epidemic situation. In this context, serological surveys represent an important tool to assess the extent of the exposure to SARS-CoV-2 in the general population. A single survey provides a snapshot of the extent of the virus spread at a given time point, and informs on vulnerable population groups, on the denominators used to calculate infection fatality rate or hospitalization rates [5]. In Mali, a multi-site study including a peri-urban area of the capital city Bamako demonstrated a sharp increase in seroprevalence between a survey conducted after the first wave of clinical cases (August 2020) and a survey conducted during the decrease of the second wave (January 21), identifying geographical location and age as associated factors [6]. Indeed, Sagara *et al.* reported in the peri-urban area of Sotuba a crude seroprevalence of 13.1 % (n=587) after the first wave. In the capital city of Kinshasa, Nkuba *et al.* reported a similar result with a seroprevalence of 16.6% (n=1233) [7].

Seroprevalence is also essential to assess the level of herd immunity that has been developed, which determines the risk of the following epidemic waves, their potential severity and their potential impact on the healthcare system. Measuring immunity could also help develop response strategies including priority strains for vaccination or targeted awareness campaigns.

In the settings where mortality and hospitalization statistics are not readily available, approximating the number of infections by age groups and by gender was also important to estimate the order of magnitude for expected infection fatality rates and compare it to reported COVID-19 deaths [8].

In addition, better access to information on epidemiological trends, social factors associated, health and protective behaviors, as well as attitudes and beliefs, was needed to design control strategies and strengthen information and awareness campaigns.

The aim of this study was to estimate the seroprevalence of SARS-CoV-2 in the population of the most populated and affected commune of Bamako, after the first epidemic wave. We also assessed demographic, social and living conditions associated with SARS-CoV-2 seropositivity, and health behaviors, knowledges according to COVID-19.

## Methods



## 135 **Study design and sample size calculation**

136 In accordance with the WHO guidelines protocol for age-stratified population-based sero-  
137 epidemiological surveys for COVID-19 infection, a cross-sectional household survey was conducted [8]  
138 in the 3 most affected and populated neighborhoods of Bamako's commune VI: Faladié,  
139 Banakabougou, and Yirimadjo (Figure 1), September 2020. At the time of the protocol (July 2020), the  
140 number of cases reported was 38, 29, and 40 respectively for these neighborhoods, representing  
141 0.07 cases/ 100 inhabitants, and 54% of the total reported cases in Commune VI.

142  
143  
144  
145  
146

**Figure 1: Map of Bamako showing the location of the 3 investigated neighborhoods within the Commune VI (in red).**

147 The sample size was calculated assuming an expected prevalence of COVID-19 infection of  
148 0.07 cases/ 100 inhabitants, within the population. Based on this assumption, a sample size of  
149 1300 persons was estimated, with a precision of 2% and a confidence interval of 95%. Considering 15%  
150 loss, 1500 participants were expected to be included. A multi-stage cluster sampling method covering  
151 all age  $\geq 1$  groups of the population was performed [9]. In the first stage, the sample size to be recruited  
152 per district was proportional to the district population sizes. In the second stage, each district was  
153 divided into different sectors (4 or more) of relatively equal sub-population size. The household survey  
154 therefore concerned each sector of each district. The first household in each sector was selected by  
155 choosing a random direction from the center of the community sector, counting the houses along that  
156 road and selecting one at random. Subsequent households were selected by visiting the closest house  
157 to the previous one. All household members in the age range willing to participate were recruited. The  
158 study was conducted among the general population aged  $\geq 1$ -year-old for the seroprevalence study,  
159 and  $\geq 12$ -year-old for the questionnaire survey. A housing unit was defined as a private one, such as  
160 apartment or villa or collective house (living quarter called "compound") with its own separate entry.  
161 Common residence rules (*de jure* rules) defined household unit as group of first-degree relatives  
162 usually living in the same housing unit. This approach allowed considering Malian family structure and  
163 local housing habits to define household units.

164

## 165 **Individual sample and data collection**

166 After informed consent obtained from the participants or their parents, 2ml of blood were collected  
167 from all voluntary participants by venipuncture (September 2020), to perform serological tests.  
168 Following the blood sampling, a face-to-face questionnaire was administered to collect the following  
169 demographic and sociologic factors: gender, age, history of recent travel within and outside Bamako,  
170 socio-economic level, contact with COVID-19 cases, occupation, education level, recent treatment, and  
171 attendance at places of worship. The questionnaire also included items relative to the knowledge  
172 about the disease, protective measures and consequences on the population health.

173

## 174 **Housing conditions and household data collection**

175 The head of household was asked to answer a specific questionnaire documenting their individual  
176 characteristics (age, gender, education, profession), household structure (number and age of  
177 members) and housing conditions including housing equipment, goods, and incomes of family (car, TV,  
178 motorbike, cell phone, external funding...). Assessing social characteristics and housing conditions,  
179 three specific profiles have been determined. To determine household profile as social proxy the  
180 location and family structure, goods and incomes and housing conditions were used.

181

182

183

## 184 **Biological analyses**

1  
2  
3 185 The level of exposure of the population to SARS-CoV-2 was estimated by serology. Sera were separated  
4 186 from whole blood and stored at -80°C in cryotubes. SARS-CoV-2 specific IgM and IgG antibodies were  
5 187 assayed in sera by VIDAS® anti-SARS-CoV-2 IgM and anti-SARS-CoV-2 IgG kits (BioMérieux, Lyon,  
6 188 France) [10]. The VIDAS® anti-SARS-CoV-2 IgM and anti-SARS-CoV-2 IgG tests relied on the SARS-CoV-  
7 189 2 Spike protein immunoassay technique to measure the presence of antibodies in infected  
8 190 participants. Compared to PCR, the sensitivity of the VIDAS® tests for IgM and IgG is 90.4% and 88.6%,  
9 191 8-15 days after SARS-CoV-2 infection, 100 and 96.6%, 16 days after infection, respectively. The  
10 192 specificity for IgM and IgG is 99.4% and 99.6%, respectively. In this context, the specificity of the tests  
11 193 was particularly important to ensure that the test of an un-infected participant was indeed  
12 194 systematically negative. Serology analyses were performed at the Charles Mérieux Infectiology Centre  
13 195 in Bamako, Mali.

14 196 Participants were defined as SARS-CoV-2 seropositive if they presented either a positive IgG or IgM  
15 197 result. Individuals were defined as SARS-CoV-2 seronegative if they presented a negative IgG and IgM  
16 198 result, or a negative IgG and a missing IgM result. Individuals with missing IgG results were excluded  
17 199 from the seroprevalence analysis.

18 200 The seroprevalence was estimated as the number of SARS-CoV-2 seropositive by the number of  
19 201 participants. The number of infections for the district of Bamako was estimated using the population  
20 202 of Bamako by sex and age categories. The number of deaths was estimated by using the age- and sex-  
21 203 specific mortality data reported early in the pandemic (February-March in China, prior to the  
22 204 optimization of clinical management) [11].  
23 205

## 24 206 **Knowledges, attitudes, behaviors, practices outcomes measures**

25 207 The current at-risk practices have been measured using a four bipolar Likert Items on practices during  
26 208 the seven past days assessing: wearing mask when not at home, washing hands with soap, going to  
27 209 crowded areas during the day or the night. Regarding behavior questions, six bipolar Likert Items (from  
28 210 systematically/very often to never) on behavior changes since the start of the epidemic focusing on:  
29 211 washing hands, visiting friends and relatives, going to crowded areas, touching each other, sneezing  
30 212 into elbow, reducing travel. Regarding knowledge questions, a scale-score based on 13 items  
31 213 (True/False/Don't know) on prevention, treatment, symptoms, and transmission of SARS-CoV-2 has  
32 214 been build up. At least, regarding cultural beliefs, four bipolar Likert Items (from strongly agreed to  
33 215 strongly disagreed) assessed opinion about the disease focusing on infection origin: a divine  
34 216 punishment, a spell casting, a white people illness, a way to get money for rich people.  
35 217

## 36 218 **Data analysis**

37 219 First, descriptive analyses estimated mean, prevalence and frequencies, associated with 95%  
38 220 confidence intervals (CI95%).

39 221 Household profiles were determined by using a 2 step descriptive approach [12]: first a multiple  
40 222 component analysis (MCA), second a Hierarchical Ascendant Classification (HAC). Based on household  
41 223 level variables, this approach led to determine classes according to the different household profiles.  
42 224 Each individual was assigned to its household profile.  
43 225

44 226 Second, in order to estimate factors associated with SARS-CoV-2 seropositivity, we used logistic  
45 227 generalized additive multilevel models (GAMM) [13]. We analyzed the effects of age and sex at  
46 228 individual level, as well as household profile [14]. Intra-household contamination was assessed as a  
47 229 binary variable (more than 1 positive case or not). The GAMM approach allowed also verifying the non-  
48 230 linear effect of continuous covariates by using spline smoothing [15]. The model included random  
49 231 effects for household, compound and district sector to reflect sampling structure and potential  
50 232 correlations between participants sharing the same living space (household nested in compound  
51 233 sampled in the same sector). Main statistical tests were performed using an  $\alpha$ -probability threshold of  
52 234 5%, but with Bonferroni correction for sub-group analyses.

235  
236 Data analyses were performed using the SPSS software (IBM Corp. Released 2020. IBM SPSS Statistics  
237 for Windows, Version 27.0. Armonk, NY: IBM Corp) for the questionnaire data management and  
238 descriptive analyses, and the R software (version 4.0.0, R Core Team 2020. R Foundation for Statistical  
239 Computing, Vienna, Austria.) with the following specific packages: {FactoMineR}, {lme4}, {gamm4}.

## 241 **Ethics and regulations**

242 The authorization to conduct the study was obtained on August 28<sup>th</sup>, 2020, from the Ministry of Health  
243 and Social Affairs of Mali (decision letter number 2020-001424-MSAS-SG). Clearance from the ethics  
244 committee of the Faculties of Medicine and Odonto-Stomatology and Pharmacy, University of  
245 Sciences, Technics and Technologies of Bamako (Mali) was obtained on August 10<sup>th</sup>, 2020 (clearance  
246 letter number 2020/162/CA/FMOS/FAPH). First, a community agreement was obtained from district  
247 leaders, local religious leaders, community associations and municipal authorities after explanation  
248 and discussion about the study protocol. Second, consents and/or assents of participants or their  
249 parent/guardian were obtained. The study team administered consent in French and local languages,  
250 and, if the participant or parent/guardian was not literate, in the presence of a witness. Individuals  
251 from each family consented separately. This study was registered in the registry of the ethics  
252 committee of the Faculty of Medicine and Odonto-Stomatology and the Faculty of Pharmacy, Bamako,  
253 Mali, under the number: 2020/162/CA/FMOS/FAPH.

## 255 **Patients and Public involvement**

257 The national federation of community health associations is part of the COVID-19 national committee,  
258 contacted during study design. For recruitment, the local Community Health Association appointed  
259 community health workers as part as the field investigation team. The mayor of the commune, after  
260 receiving information on the study, issued a radio announcement to inform the population of the  
261 survey and to solicit their participation. A community representative, selected by the neighborhood  
262 head and independent from the research team, participated to the field study as a witness, ensuring  
263 that participants understand the study and that they have given their informed consent.

264 The field study team provided a report to the local authorities and to the community health  
265 association. All participants who wanted to have personal results (or any question about the study)  
266 had 2 medical contacts (telephone numbers). Public feedback meetings were held with the local  
267 community health association and the local authorities.

## 269 **Results**

### 271 **Inclusions**

272 A sample of 174 housing units (separate living quarter) were investigated including 2,015 inhabitants  
273 grouped in 306 identified household units.

274 Of 2,015 inhabitants, 1,526 (75.7%) participants aged  $\geq 1$  year provided a blood sample for the  
275 seroprevalence survey and 962 participants aged  $\geq 12$  years answered the KABP survey (Appendix table  
276 A1). Data on housing conditions were collected for 220 of the 306 household units included, *i.e.* 78.9%  
277 of the household members tested ( $n=1,204$ ) (Figure 2).

### 279 **Figure 2: flowchart of the seroprevalence survey**

## 282 SARS-CoV-2 seroprevalence

283 Out of 1,526 participants, 2 did not provide samples, 170 had no interpretable test results for both IgG  
 284 and IgM, and 27 inconclusive results due to a missing IgG and negative IgM results or inversely. Overall,  
 285 interpretable serological results were available for 1,327 participants, corresponding to 227 SARS-CoV-  
 286 2 seropositive (by either IgG, IgM or both) and 1,100 seronegative individuals. The crude  
 287 seroprevalence rate was estimated at 17.1% (95% Confidence interval (CI95%) [15.1-19.1], ranging  
 288 from less than 10% to upper than 30% across genders and age groups (Figure 3).

### 290 Figure 3: Seroprevalence by age and sex (Bamako, n=1327, September 2020).

291  
 292 Applying estimated prevalence, by age and sex, to the population of the district of Bamako (2.42 million  
 293 inhabitants), we estimated around 400,000 the number of infections in the city between the onset of  
 294 the epidemic and the time of the survey (September 2020), compared to 1,532 recorded cases for the  
 295 district of Bamako. This corresponded to an adjusted prevalence of 16.4% [8.0-24.9] (adjusted on the  
 296 population age and sex distribution) vs an observed prevalence of 0.06%. Using the age- and sex-  
 297 specific mortality data reported early in the pandemic, we roughly estimated 1,725 COVID-19 deaths  
 298 occurred between the onset of the pandemic and the date of the survey, *i.e.* more than twenty times  
 299 the 81 official reported deaths (table 1). According to these estimates, the detection rates were low,  
 300 with only 0.4% of cases and 5% of deaths reported.

302 **Table 1: SARS-CoV-2 seroprevalence in the study sample, and estimated vs reported cases and**  
 303 **deaths at Bamako city level after accounting for age population structure (Bamako, n=1,526,**  
 304 **September 2020).**

|                                  |                                       | N=<br>[95% confidence<br>interval] | Prevalence (%)<br>[95% confidence<br>interval] |
|----------------------------------|---------------------------------------|------------------------------------|------------------------------------------------|
| SARS-CoV-2 serological status    | positive                              | 227                                | 17.1%<br>[13.7-20.5]                           |
|                                  | negative                              | 1,100                              |                                                |
| Population (inhabitants in 2020) |                                       | 2,420,000                          |                                                |
| COVID-19 in Bamako               | Cases, reported after confirmation*   | 1,532                              | 0.07%                                          |
|                                  | Infections, estimated                 | 397,321<br>[192,452-602,183]       | 16.4%<br>[8.0-24.9]                            |
| Mortality                        | Deaths, reported*                     | 81                                 | 0.003%                                         |
|                                  | Deaths, estimated based on infections | 1,725<br>[476-2,970]               | 0.07%<br>[0.02-0.12]                           |

\* reference: COVID-19 in Mali situation report n°121 (21-27 September 2020), Ministry of Health, Mali

## 307 Household profile as social proxy

308 Among the 220 households documented, 64.6% (n=142) lived in a private house, 19.1% (n=42) shared  
 309 their house with another family and 12.3% (n=27) with two others. Only 0.9% (n=2) shared their house  
 310 with more than two other families (three or four).

311 The first profile selected was labelled "Low Income Small Family" units (LISF, n=62), and the second  
 312 "Low Income Large Family" units (LILF, n=117). These two profiles, mainly located at Yirimadio and  
 313 Banankabougou, were associated with a low level of incomes or goods, and poor housing conditions.  
 314 The main difference between these two profiles came from the household size: 8.1% of large family

(>10 members) vs 27.4% (p=0.002). The LISF profile showed also slightly (but significant) less livestock than the LILF profile (8.1% vs 12.8%, p<0.001), slightly more private toilets (24.2% vs 19.7%, p<0.001), and less rooms (14.5% vs 33.3%, p<0.001). Both profiles showed a low level of education (resp. 35.5% and 46.2% of no education), and around 50% of private house (Table 2).

The third and last profile, mainly located at Faladie (68%), showed significant high level of incomes (75.6% with a private car, 41.5% having an external financial help, 43.9% having livestock) and best housing conditions (95.4% having a private house, 51.2% having private toilets, 80.5% having more than 4 rooms), and, consequently, was labelled “High Income Family” units (HIF, n=41).

**Table 2: Household units’ main characteristics (Bamako, n=220, September 2020)**

|                                                                   | LISF*<br>(ref-%) | LILF*<br>(%) | HIF*<br>(%) | p-value             |                     | Subgroup analysis   |  |
|-------------------------------------------------------------------|------------------|--------------|-------------|---------------------|---------------------|---------------------|--|
|                                                                   |                  |              |             | Global              | LILF vs LISF        | LILF vs HIF         |  |
| <b>Dimension 1: Location and family structure</b>                 |                  |              |             |                     |                     |                     |  |
| Location                                                          |                  |              |             | <0.001 <sup>§</sup> | 0.052               | <0.001 <sup>§</sup> |  |
| BANAKABOUGOU                                                      | 30.6%            | 22.2%        | 22.0%       |                     |                     |                     |  |
| YIRIMADIO                                                         | 58.1%            | 51.3%        | 9.8%        |                     |                     |                     |  |
| FALADIE                                                           | 11.3%            | 26.5%        | 68.3%       |                     |                     |                     |  |
| Large family (>10members vs less)                                 | 8.1%             | 27.4%        | 46.3%       | <0.001 <sup>§</sup> | 0.002 <sup>§</sup>  | <0.001 <sup>§</sup> |  |
| Family chief with low level of education (no school vs education) | 35.5%            | 46.2%        | 7.3%        | <0.001 <sup>§</sup> | 0.169               | <0.001 <sup>§</sup> |  |
| Family chief with high level of education (post-graduate vs no)   | 14.5%            | 16.2%        | 78.8%       | <0.001 <sup>§</sup> | 0.763               | <0.001 <sup>§</sup> |  |
| <b>Dimension 2: Incomes and goods of Household unit</b>           |                  |              |             |                     |                     |                     |  |
| Help from outside (members living outside Mali vs no)             | 4.8%             | 3.4%         | 41.5%       | <0.001 <sup>§</sup> | 0.641               | <0.001 <sup>§</sup> |  |
| Goods: private car (yes vs no)                                    | 9.7%             | 9.5%         | 75.6%       | <0.001 <sup>§</sup> | 0.952               | <0.001 <sup>§</sup> |  |
| Goods: livestock (yes vs no)                                      | 8.1%             | 12.8%        | 43.9%       | <0.001 <sup>§</sup> | <0.001 <sup>§</sup> | <0.001 <sup>§</sup> |  |
| <b>Dimension 3: Housing conditions</b>                            |                  |              |             |                     |                     |                     |  |
| Private house (yes vs no)                                         | 45.2%            | 49.6%        | 85.4%       | <0.001 <sup>§</sup> | 0.574               | <0.001 <sup>§</sup> |  |
| House with private toilets (yes vs no)                            | 24.2%            | 19.7%        | 51.2%       | <0.001 <sup>§</sup> | <0.001 <sup>§</sup> | <0.001 <sup>§</sup> |  |
| Size of the housing unit (>4 vs 4<= rooms)                        | 14.5%            | 33.3%        | 80.5%       | <0.001 <sup>§</sup> | <0.001 <sup>§</sup> | <0.001 <sup>§</sup> |  |

\*Household profiles defined by hierarchical clustering on components after MCA ('LISF' Low Income Small Family, 'LILF' for Low Income Large Family, 'HIF' for High Income Family)

<sup>§</sup>significant after Bonferroni correction

### Factors associated with SARS-CoV-2 seropositivity

Factors associated with SARS-CoV-2 seropositivity were identified with a multilevel logistic regression approach (Table 3) (individual, household and neighborhood levels). There were no significant differences between the three neighborhoods. Women and older age were significantly associated with increased odds of seropositivity, showing respectively adjusted Odd Ratios (aOR [CI95%]) of 1.75 [1.27;2.43] and 1.06 [1.01;1.11]. Having a positive household member was associated with an increased odd of seropositivity (aOR=1.54 [1.08;2.19]). Household corresponding to the highest socio-demographic status appeared to have increased (but not significant, p=0.06) odds of seropositivity compared to households of low-income status living in (aOR=1.74 [0.99;3.07]).

343 **Table 3: Factors associated with SARS-CoV-2 seropositivity**

|                                                |               | SARS-CoV-2 serology<br>n(%)/median (IQR) |                           | Univariate*      |                     | Multivariate*    |                     |
|------------------------------------------------|---------------|------------------------------------------|---------------------------|------------------|---------------------|------------------|---------------------|
|                                                |               | Negative<br>(n=)                         | Positive<br>N; % [CI95%]  | OR [CI95%]       | p                   | aOR [CI95%]      | p                   |
| <b>Sex</b>                                     | Male          | 456                                      | 67; 12.8%<br>[9.0-16.6]   | 1                |                     | 1                |                     |
|                                                | Female        | 644                                      | 160; 19.9%<br>[15.2-24.6] | 1.78 [1.28;2.49] | <0.001 <sup>§</sup> | 1.75 [1.27;2.43] | <0.001 <sup>§</sup> |
| <b>Age**</b>                                   |               | 16 (9-25)                                | 18; [11-30]               | 1.07 [1.02;1.12] | 0.008 <sup>§</sup>  | 1.06 [1.01;1.11] | 0.017 <sup>§</sup>  |
| <b>Household<br/>profile***</b>                | LISF          | 304                                      | 54; 15.1%<br>[6.9-23.3]   | 1                |                     | 1                |                     |
|                                                | LILF          | 456                                      | 93; 16.9%<br>[11.7-22.2]  | 1.08 [0.67;1.74] | 0.75                | 1.14 [0.74;1.74] | 0.56                |
|                                                | HIF           | 119                                      | 39; 24.7%<br>[14.1-35.2]  | 1.66 [0.88;3.12] | 0.12                | 1.74 [0.99;3.07] | 0.06                |
|                                                | Unclassified  | 221                                      | 41; 15.6%<br>[10.2-21.1]  | 0.91 [0.52;1.58] | 0.74                | 1.03 [0.62;1.72] | 0.91                |
| <b>Already 1<br/>case in the<br/>household</b> | No            | 412                                      | 65; 12.6%<br>[5.0-20.2]   | 1                |                     | 1                |                     |
|                                                | Yes           | 688                                      | 162; 20.0%<br>[15.0-25.0] | 1.37 [0.96;1.95] | 0.085               | 1.54 [1.08;2.19] | 0.018 <sup>§</sup>  |
| <b>Neighbor-<br/>hoods</b>                     | Banankabougou | 454                                      | 96; 17.5%<br>[10.6-24.3]  | 1                | 0.98                | Not included     |                     |
|                                                | Faladie       | 229                                      | 49; 17.6%<br>[10.3-24.9]  | 0.98 [0.57;1.70] |                     |                  |                     |
|                                                | Yirimadio     | 417                                      | 82; 16.4%<br>[10.8-22.0]  | 1.03 [0.67;1.59] |                     |                  |                     |

344 <sup>§</sup>significant test result

345 \* n=1327

346 \*\* n=1323 (4 participants showing negative serology with missing ages)

347 \*\*\* 'LISF' Low Income Small Family, 'LILF' for Low Income Large Family, 'HIF' for High Income Family

348 **Knowledge, attitudes, behaviors, practices (KABP)**

349 The KABP score, using the 13 items (false/true/don't know questions) described in table 4, showed no  
350 mean differences according to gender, with respectively mean=7.9 vs 7.6, p=0.065. Men and women  
351 differ in their risk behaviors and practices toward COVID-19 regardless of age. Despite reporting social  
352 restriction from the beginning of the epidemic, mainly contact with friends, women were less likely  
353 than men to wear a mask outdoors and to avoid going to crowded places. (Appendix Tables A2 and  
354 A3). Attitudes, behaviors and practices measured by age and gender (Tables 5a and 5b) showed, at  
355 first, a high level of denial on COVID-19 disease: a large part believed that COVID-19 was a punishment  
356 from God (43.7%), a belief mainly shared by older people (mean=25.1 years) compared to others  
357 (mean=21.7 years). Many participants believed that COVID-19 was introduced in Mali by white people  
358 (45.3%). Other opinion was less held among participants: almost one-third (30.3%) thought that  
359 COVID-19 was a way used by Malian politicians to take money from developed countries. This last  
360 opinion was shared more among men than women (33.6% vs 26.2%, p=0.01). A small proportion of  
361 participants believed that COVID-19 was due to a spell (14.8%).

362 Concerning changes in daily preventive behaviors from the start of the COVID-19 pandemic, hand  
363 washing was reported as the most used by people: only 4.9% of the participants declared rarely, very  
364 rarely or never washing hands in their daily life, compared to 29.9% who declared washing hands  
365 systematically. Conversely, few participants reported adopting systematically other preventive  
366 behaviors in their daily life, such as blowing into the elbow (12.9%), stop touching other people  
367 (15.0%), traveling less frequently (11.1%), avoid populated places (9.3%), and avoiding seeing friends  
368

(6.6%). Regarding results displayed by age and sex (tables 5a and 5b), the youngest participants were more reluctant to change their daily behaviors regardless their gender.

Finally, most of the participants declared having at-risk practices during the 7 last days, such as never wearing mask when outside (32.7%), visiting very often or daily highly populated public places (31.0%), going out very often or every night (26.1%), not washing hands most of the time (43.2%), staying in closed spaces more than two hours daily or very often (22.4%), or participating to social or family events daily or very often (40,3%). Young participants declared wearing mask less systematically or very often: mean age=22 years vs mean age=25 years). Young women also declared more visiting populated public places than men (40.2% vs 24.2%, 20–39-year-old).

**Table 4: Knowledge on COVID-19 (Bamako, n=962, September 2020).**

| Questions (true/false/ don't know)                                                                                                         | Success (%) |
|--------------------------------------------------------------------------------------------------------------------------------------------|-------------|
| 1. The main clinical symptoms of the disease are dry cough, fever, tiredness and muscle pain (true)                                        | 65.0%       |
| 2. Unlike the common cold, blocked nose, runny nose and sneezing are not symptoms that are systematically associated with COVID-19. (true) | 42.7%       |
| 3. At present there is no treatment for COVID-19 but early treatment of symptoms can help patients recover (true)                          | 67.0%       |
| 4. Not all infected people will develop severe forms of the disease (true)                                                                 | 60.0%       |
| 5. Older people, those with chronic illnesses and the obese are at greater risk of developing a severe form (true)                         | 65.2%       |
| 6. Eating or touching wild animals can lead to infection (false)                                                                           | 16.7%       |
| 7. People with the virus, if they do not have a fever, are not contagious and therefore cannot transmit COVID-19 to others (false)         | 30.6%       |
| 8. COVID-19 is primarily transmitted by respiratory droplets from infected persons. (true)                                                 | 70.5%       |
| 9. Residents of epidemic areas can wear masks to prevent infection by the COVID-19 virus (true)                                            | 73.4%       |
| 10. COVID-19 prevention measures do not apply to children and young adults. (false)                                                        | 37.2%       |
| 11. To prevent COVID-19 infection, people should avoid going to populated places (mosques, markets, railway stations) (true)               | 72.7%       |
| 12. Isolating infected people helps to reduce transmission of the virus (true)                                                             | 77.9%       |
| 13. Any person in contact with an infected person should be isolated in a suitable place for an observation period of 14 days (true)       | 80.2%       |

*Mean score (SD) one point by correct answer from 0 to 13 (13 items scale)*

*measure of internal consistency: Cronbach's alpha (0.73).*

*measure of validity (factor analysis): Kaiser-Meyer-Olkin (0.882); Barlett test ( $p < 0.001$ )*

381

382 **Table 5a: Knowledges, attitudes, behaviors and practices toward COVID-19 among Bamako inhabitants (Bamako, n=962, September 2020)**

|                                                                                                                | 12-19 years old |       |         | 20-39 years old |              |              |
|----------------------------------------------------------------------------------------------------------------|-----------------|-------|---------|-----------------|--------------|--------------|
|                                                                                                                | Men             | Women | p value | Men             | Women        | p value      |
| <i>Attitudes/denials towards COVID-19 measured by agreement (agreed, very agreed) with following opinions:</i> |                 |       |         |                 |              |              |
| Is a God Punishment                                                                                            | 40.1%           | 41.7% | 0.702   | 41.2%           | 44.6%        | 0.591        |
| Has been introduced in Mali by the white people                                                                | 46.4%           | 43.6% | 0.487   | 48.5%           | 46.4%        | 0.749        |
| Is due to a spell                                                                                              | 14.9%           | 15.6% | 0.822   | 11.5%           | 14.3%        | 0.509        |
| Help politicians' strategy to take money from developed countries                                              | 33.8%           | 27.8% | 0.112   | <b>37.4%</b>    | <b>24.1%</b> | <b>0.026</b> |
| <i>Systematic daily changes in behaviors reported from the start of COVID-19 pandemic:</i>                     |                 |       |         |                 |              |              |
| Washing hands                                                                                                  | 27.5%           | 24.6% | 0.420   | 35.9%           | 35.7%        | 0.979        |
| Blowing into the elbow                                                                                         | 12.6%           | 8.4%  | 0.099   | 14.4%           | 14.4%        | 0.996        |
| Stop touching other people (systematically)                                                                    | 12.6%           | 15.2% | 0.353   | 14.4%           | 16.1%        | 0.716        |
| Traveling less frequently                                                                                      | 8.7%            | 9.8%  | 0.616   | 14.4%           | 13.4%        | 0.822        |
| Avoiding populated places                                                                                      | 7.2%            | 9.1%  | 0.389   | 13.0%           | 11.6%        | 0.746        |
| Avoiding seeing friends                                                                                        | 3.9%            | 5.7%  | 0.299   | 8.4%            | 11.6%        | 0.403        |



| <i>At-risk practices during the seven past days declared:</i>                 |       |       |       |              |              |                          |
|-------------------------------------------------------------------------------|-------|-------|-------|--------------|--------------|--------------------------|
| Wearing mask outside systematically or very often                             | 27.5% | 24.2% | 0.361 | 32.8%        | 33.0%        | 0.972                    |
| Visiting populated public places every day or very often                      | 31.4% | 27.8% | 0.329 | <b>24.2%</b> | <b>40.2%</b> | <b>0.008<sup>§</sup></b> |
| Going out every night or very often                                           | 21.3% | 17.5% | 0.250 | 13.0%        | 17.9%        | 0.291                    |
| Washing hands when necessary                                                  | 59.1% | 57.4% | 0.677 | 51.1%        | 56.3%        | 0.426                    |
| Staying every day, or very often, more than two hours in a small closed space | 22.8% | 22.4% | 0.926 | 20.5%        | 20.7%        | 0.959                    |
| Had participated to social events every day or very often                     | 21.3% | 21.6% | 0.921 | 18.9%        | 24.1%        | 0.326                    |

383 <sup>§</sup>significant, after Bonferroni correction

384

385 **Table 5b: Knowledges, attitudes, behaviors and practices toward COVID-19 among Bamako inhabitants (Bamako, n=962, September 2020)**

|                                                                                                                | 39-64 years old |       |         | >64 years old |       |         |
|----------------------------------------------------------------------------------------------------------------|-----------------|-------|---------|---------------|-------|---------|
|                                                                                                                | Men             | Women | p value | Men           | Women | p value |
| <i>Attitudes/denials towards COVID-19 measured by agreement (agreed, very agreed) with following opinions:</i> |                 |       |         |               |       |         |

1  
2  
3  
4  
5  
6  
7  
8  
9  
10  
11  
12  
13  
14  
15  
16  
17  
18  
19  
20  
21  
22  
23  
24  
25  
26  
27  
28  
29  
30  
31  
32  
33  
34  
35  
36  
37  
38  
39  
40  
41  
42  
43  
44  
45  
46

|                                                                                            |              |              |              |              |             |              |
|--------------------------------------------------------------------------------------------|--------------|--------------|--------------|--------------|-------------|--------------|
| Is a God Punishment                                                                        | 41.2%        | 44.6%        | 0.591        | 55.1%        | 60.4%       | 0.596        |
| Has been introduced in Mali by the white people                                            | 48.5%        | 46.4%        | 0.749        | 38.8%        | 39.6%       | 0.935        |
| Is due to a spell                                                                          | 11.5%        | 14.3%        | 0.509        | 12.2%        | 12.8%       | 0.938        |
| Help politicians' strategy to take money from developed countries                          | <b>37.4%</b> | <b>24.1%</b> | <b>0.026</b> | 24.5%        | 22.9%       | 0.855        |
| <i>Systematic daily changes in behaviors reported from the start of COVID-19 pandemic:</i> |              |              |              |              |             |              |
| Washing hands                                                                              | 30.6%        | 41.7%        | 0.257        | 33.3%        | 33.3%       | 1.000        |
| Blowing into the elbow                                                                     | 24.5%        | 12.5%        | 0.129        | <b>46.7%</b> | <b>0.0%</b> | <b>0.015</b> |
| Stop touching other people (systematically)                                                | 16.3%        | 22.9%        | 0.414        | 33.3%        | 11.1%       | 0.224        |
| Traveling less frequently                                                                  | 8.0%         | 20.8%        | 0.070        | 26.7%        | 0.0%        | 0.090        |
| Avoiding populated places                                                                  | 8.0%         | 14.6%        | 0.302        | 6.7%         | 11.1%       | 0.703        |
| Avoiding seeing friends                                                                    | 8.0%         | 12.5%        | 0.462        | 13.3%        | 0.0         | 0.253        |
| <i>At-risk practices during the seven past days declared:</i>                              |              |              |              |              |             |              |
| Wearing mask outside systematically or very often                                          | 32.7%        | 37.5%        | 0.617        | 46.7%        | 44.4%       | 0.916        |

|                                 |                                                                               |       |       |       |             |              |              |
|---------------------------------|-------------------------------------------------------------------------------|-------|-------|-------|-------------|--------------|--------------|
| 1<br>2<br>3<br>4<br>5<br>6<br>7 | Visiting populated public places every day or very often                      | 40.8% | 41.7% | 0.932 | <b>0.0%</b> | <b>30.0%</b> | <b>0.024</b> |
| 8<br>9<br>10                    | Going out every night or very often                                           | 28.6% | 20.8% | 0.377 | <b>0.0%</b> | <b>30.0%</b> | <b>0.024</b> |
| 11<br>12<br>13                  | Washing hands when necessary                                                  | 40.8% | 47.9% | 0.482 | 33.3%       | 40.0%        | 0.734        |
| 14<br>15<br>16<br>17<br>18      | Staying every day, or very often, more than two hours in a small closed space | 28.5% | 25.0% | 0.691 | 6.7%        | 30.0%        | 0.119        |
| 19<br>20<br>21<br>22<br>23      | Had participated to social events every day or very often                     | 32.7% | 27.1% | 0.549 | 6.7%        | 22.2%        | 0.265        |

24 386 <sup>§</sup>significant, after Bonferroni correction

387

## Discussion

388 SARS-CoV-2 population adjusted seroprevalence in the urban commune VI of the Bamako district was  
389 16.4% [8.0-24.9]. This prevalence was much higher than the cumulative incidence reported by  
390 epidemiological surveillance since the beginning of the pandemic on the investigation site, which was  
391 0.07% at the time of this survey (September 2020). It can be assumed that there was still active  
392 circulation of the virus in the capital city at the time of the surveys, suggested by the presence of IgM  
393 positive individuals. The corrected survey data suggest that a high number of SARS-CoV-2 infections  
394 occurred in the study site. Projected on the total population of Bamako, this prevalence would  
395 correspond to a total of 397,321 cases in September 2020. Mortality projections are crude but suggest  
396 that deaths caused by COVID-19 were also under-reported, with 81 reported for an estimated 1,720  
397 expected deaths in Bamako in September 2020. The presence of IgM positive individuals suggests the  
398 persistence of active viral circulation at the time of the survey.

400

401 Seroprevalence was significantly lower in the Kenyan study, reporting 5.6% in a sample of 3,098 blood  
402 donors during the same period [16]. This study found a higher prevalence in urban cities and more  
403 widespread circulation of SARS-CoV-2 than reported by case-based surveillance. A similar study  
404 conducted in Kinshasa, Democratic Republic of Congo, in October-November 2020 after the first wave  
405 found a prevalence of 16.6%, a value close to that estimated here [7]. The differences between the  
406 different districts of the Congolese capital were not significant, as in the commune VI of Bamako. In  
407 Mali, Sagara *et al.* reported in the peri-urban area of Sotuba a crude seroprevalence of 13.1 % (n=587)  
408 across samples collected over a 2-month period after the first wave. But the subsequent study  
409 conducted in January 2021 in this peri-urban area showed an adjusted seroprevalence rate of 73.4%,  
410 after the second COVID-19 wave [6]. This sharp increase in the prevalence rate can be explained by a  
411 wave of intense transmission of COVID-19 related to alpha variant in Mali between November 2020  
412 and January 2021 together with the increase of the screening capacity of the health services [4].  
413 Indeed, 3,258 new cases were officially reported at the Bamako district (and 172 new deaths) between  
414 November 1<sup>st</sup>, 2020 and January 24<sup>th</sup>, 2021. The availability of diagnostic tests and trained staff  
415 improved reporting over time.

416

417 In our study, seropositivity was higher among older participant and women. Conversely, in Senegal, a  
418 survey of the acceptability of the measures to fight the COVID-19 found a predominance of the 25-59  
419 years age and male group [17]. Similarly, a literature review on seroprevalence among health workers  
420 worldwide found a seroprevalence of 8.2% in Africa with a male predominance [18]. This difference  
421 may be explained by the methodology of our study, which recruited only in households and during the  
422 day, *i.e.* working time: men aged 20 to 60 may be under-represented in our sample.

423 The main demographic characteristics (age and gender) and proximity as a high potential contact rate  
424 (a household member already infected) remained significantly associated with seropositivity after  
425 adjusting for the contextual elements available. Although the household condition profile was not a  
426 significant determinant of seropositivity, the impact of infection among High Income Family units  
427 should be discussed (aOR 1.74 [0.99;3.07]). Indeed, Low Income families are more likely to live  
428 outdoors, to have lower ages, to have fewer co-morbidities (obesity, diabetes) in this population.

429 The age-related results were consistent with the epidemiological trends observed during the first wave  
430 of the epidemic worldwide: young people were less exposed than older one. The KABP survey revealed  
431 that young participants had, at the time of the survey, a higher level of risk practices, and were more  
432 reluctant to change their health behavior. According to psychological models of preventive behavior,  
433 self-perceived exposure is a key component of individual acceptability of preventive behavior change

1  
2  
3 434 [19]. Nevertheless, hand washing was a common practice, perhaps associated with former epidemic  
4 435 (*e.g.* Ebola in 2014), but not mask wearing, a little-known health practice in the Malian culture.  
5 436 Conversely, the differences in results between sex show its role in the transmission of the virus in  
6 437 Bamako. Given the complexity of the relationship between sex, gender, and infectious disease [20],  
7 438 the updated medical literature reports greater vulnerability of men to COVID-19 than women due to  
8 439 gender-related social activities or comorbidities, but also due to significant sexual variations in the  
9 440 immune system [21, 22]. The vulnerability of women highlighted by our survey refers to a broader  
10 441 conception of the impact of SARS-CoV-2, including the carriage of the infection. However, with respect  
11 442 to the KABP survey results, with the exception of a tendency for women to score lower on knowledge  
12 443 of COVID-19, no significant statistical evidence emerged on an association between gender and health  
13 444 behaviors and risk practices. A possible selection bias in the serological survey could partly explain  
14 445 these results, but other hypotheses concerning the specific lifestyle and social position of West African  
15 446 women in light of exposure to infectious diseases need to be further explored. Furthermore, the results  
16 447 of multivariate analyses showing the role played by proximity in person-to-person transmission  
17 448 confirm that the spread of infectious diseases within the community involves a significant amount of  
18 449 within family transmissions due to asymptomatic transmission [23], particularly via children[24].

23 450 A study on factors associated with the acceptability of government measures against COVID-19 in  
24 451 Senegal showed a correlation between education level and the proposed measures (inter-regional  
25 452 travel ban, curfew, closure of places of worship and closure of markets). But those with primary  
26 453 education and those with no education were likely to accept of curfews and less likely to accept inter-  
27 454 regional travel bans and the closure of places of worship [17].

29 455 Finally, the trend of increasing positivity of the social indicator summarized in household profiles leads  
30 456 us to consider that understanding epidemic dynamics in populated cities involves taking into account  
31 457 the spatial structure of the population [25]. Additional evidence from geographic and socio-economic  
32 458 components [26, 27]), highlight the question of inequalities and individual vulnerability at each stage  
33 459 of the epidemic's spread: from dissemination including various factors such as household size [28],  
34 460 transmission of infection within the community to the associated societal consequences [29].

36 461 The pandemic response plan in Mali was to send suspected cases to a small number of testing and care  
37 462 centers, leading to a massive influx of patients. Indeed, in Bamako, only 2 health centers were  
38 463 dedicated to patient testing and care ("Hopital du Point G" and "Hopital du Mali"), with hospitalization  
39 464 of all confirmed cases, both symptomatic and asymptomatic. These 2 hospitals were rapidly  
40 465 overwhelmed, leading to a deterioration of the quality of care. Furthermore, at the beginning of the  
41 466 epidemic, the presence of health workers with white suits at patient homes stigmatized households:  
42 467 this situation created a denial reaction of the population according to the disease.

45 468 As a result of our work, the circulation of the virus was higher than reported. As a lesson learned from  
46 469 the epidemic, we recommend to strengthen the involvement of community health workers. These  
47 470 workers would be able to play a role in raising awareness among the population about preventive  
48 471 measures and directing patients and contact cases to diagnostic centers, including safe transportation  
49 472 of suspected COVID-19 cases. Only confirmed cases would receive appropriate care, according to  
50 473 clinical conditions. Only severe cases would be referred to health centers. Confirmed asymptomatic  
51 474 and pauci-symptomatic cases would be isolated at home with regular follow-up by community health  
52 475 workers. The health professionals would then supervise the community health workers and would  
53 476 focus on severe cases.

57 477 We also recommend to add mobile team for screening campaigns, targeted on neighborhoods, with  
58 478 the involvement of community health workers. Reducing the flow of patients, the health centers would  
59 479 be able to focus on the management of severe cases.

480

## Conclusion

In March 2022, 2 years after the pandemic onset and 4 epidemic waves, 30,398 confirmed cases (725 associated deaths) were officially reported in Mali, 20,115 for the district of Bamako, and 60 health districts (among 75) reported cases. The Commune VI remains the most affected (or the most reporting cases) area with 5,712 reported cases. However, these reported numbers under-estimate the number of infected persons. The following waves involved variants, which were more aggressive and may also have led to a heavier death toll, and the consequences could be evaluated using revised prevalence and variant-adjusted infection fatality ratios. Conducted after the first wave, this study highlights the need for sufficient screening data to design efficient epidemic control strategies. Improving diagnostic capacities as well as awareness of populations, to encourage testing and preventive behaviors, as well as avoiding the spread of false information on the epidemic remain key pillars, not matter the developed or developing setting.

## List of abbreviations

**IRD:** Institut de Recherche pour le Développement France

**HIF:** High Income Family units

**LILF:** Low Income Large Family units

**LISF:** Low Income Small Family units

**SARS-CoV-2:** Severe Acute Respiratory Syndrome Coronavirus 2

**WHO:** World Health Organization

**GAMM:** generalized additive multilevel models

**KABP:** Knowledge, Attitudes, Behaviors and Practices

## Declarations

### Ethics approval and consent to participate

The study was approved by the ethics committee of the Faculty of Medicine and Odontostomatology of Mali N°2020/162/CE/FMOS/FAPH and the Ministry of Health and Social Action N° 001424 MASA-SG.

A community agreement was first obtained from district leaders, local religious leaders, community associations and municipal authorities after explanation and discussion about the study protocol. Second, consents and/or assents of participants or their parent/guardian were obtained. The study team administered consent in local languages, and, if the participant or parent/guardian was not literate, in the presence of a witness. Individuals from each family consented separately.

### Consent for publication

NA (no personal details/images/video in the manuscript)

### Availability of supporting data

The data that support the findings of this study are available on reasonable request from the corresponding author, JG. The data are not publicly available due to confidentiality and ethical restrictions.

### Competing interests

None declared

### Funding

1  
2  
3 525 This study was funded by IRD (French National Research Institute for Sustainable Development); the  
4 526 JEAI DynaSTEC (Spatio-Temporal Dynamics of Epidemics and Environmental Changes research team);  
5 527 the French Embassy in Mali (field data collection) and the Charles Mérieux Foundation, Lyon  
6 528 (laboratory analyses); the NGO Prospective and Cooperation.

7 529 The funders had no role in the study design, data collection plan, analysis, decision to publish, or  
8 530 preparation of the manuscript.

9 531

### 532 **Author contributions**

13 533 JG and HB conceived and designed the study protocol, helped by JL, IS, MC, BK, IB, AG, OD, AD, MA,  
14 534 EB, LST, LV and MKBD. All the authors validated the study protocol.

15 535 MKBD wrote the household and KABP questionnaires, with the help of JL, MC, JG and IS.

16 536 MC, AKS and IS organized and supervised the samples and data collections, performed by AK, SS, ZD,  
17 537 CD, IT, ST, HM.

18 538 ST and IT were in charge of the information system under the supervision of IS.

19 539 JL, MKBD, MC and JG conceived and designed the data analysis. JL, MKBD and MC performed the data  
20 540 management and analysis, under the supervision of JG.

21 541 BK and AKS designed and supervised the serological analysis, performed by HM, ES, KC.

22 542 Result interpretation and discussion was performed by MC, JL, MKBD and JG, with the help of IS, BK,  
23 543 IB, AG, OD, AD, MA, EB, LST, LV.

24 544 JL, MKBD, MC and JG wrote the paper, corrected by all authors.

25 545 All authors participated to the manuscript and approved its last version.

26 546

### 27 547 **Acknowledgements**

28 548 We acknowledge the populations of the Commune VI, Bamako, the community health association, and  
29 549 all the community leaders.

30 550

### 31 551 **Authors' information**

32 552

33 553 **Mady Cissoko** [madycissoko@ymail.com](mailto:madycissoko@ymail.com); Malaria Research and Training Center, Université des  
34 554 Sciences, Techniques et Technologies, Bamako, Mali

35 555 **Jordi LANDIER** [jordi.landier@ird.fr](mailto:jordi.landier@ird.fr); IRD, INSERM, Aix Marseille Univ, SESSTIM, ISSPAM, Marseille,  
36 556 France

37 557 **bourema Kouriba** [bourema.kouriba@cicm-mali.org](mailto:bourema.kouriba@cicm-mali.org); Centre d'Infectiologie Clinique Charles Mérieux,  
38 558 Bamako, Mali

39 559 **Abdoul Karim Sangare** [sangareak@icermali.org](mailto:sangareak@icermali.org); Centre d'Infectiologie Clinique Charles Mérieux,  
40 560 Bamako, Mali

41 561 **Abdoulaye Katile** [Katile@icermali.org](mailto:Katile@icermali.org); Malaria Research and Training Center, Université des Sciences,  
42 562 Techniques et Technologies, Bamako, Mali

43 563 **Abdoulaye Djimde** [adjimde@icermali.org](mailto:adjimde@icermali.org); Malaria Research and Training Center, Université des  
44 564 Sciences, Techniques et Technologies, Bamako, Mali

45 565 **Ibrahima Berthe** [berthe\\_enet@hotmail.com](mailto:berthe_enet@hotmail.com); Direction générale de la santé et de l'hygiène publique  
46 566 du ministère de la santé et du développement social, Bamako, Mali

47 567 **Siriman Traoré** [straore@icermali.org](mailto:straore@icermali.org); Malaria Research and Training Center, Université des Sciences,  
48 568 Techniques et Technologies, Bamako, Mali

49 569 **Ismaila Thera** [ithera@icermali.org](mailto:ithera@icermali.org); Malaria Research and Training Center, Université des Sciences,  
50 570 Techniques et Technologies, Bamako, Mali

51 571 **Hadiata Maiga** [hadiata.berthe@cicm-mali.org](mailto:hadiata.berthe@cicm-mali.org); Centre d'Infectiologie Clinique Charles Mérieux,  
52 572 Bamako, Mali

53 573 **Elisabeth Sogodogo** [elisabeth.sogodogo@cicm-mali.org](mailto:elisabeth.sogodogo@cicm-mali.org); Centre d'Infectiologie Clinique Charles  
54 574 Mérieux, Bamako, Mali

- 1  
2  
3 575 **Karyn Coulibaly** [karinitonyowacoul@gmail.com](mailto:karinitonyowacoul@gmail.com); Centre d'Infectiologie Clinique Charles Mérieux,  
4 576 Bamako, Mali  
5 577 **Abdoulaye Guindo** [abdouguindo@yahoo.fr](mailto:abdouguindo@yahoo.fr); Direction générale de la santé et de l'hygiène publique  
6 578 du ministère de la santé et du développement social, Bamako, Mali  
7 579 **Ousmane Dembelé** [ousma66@yahoo.fr](mailto:ousma66@yahoo.fr); Direction générale de la santé et de l'hygiène publique du  
8 580 ministère de la santé et du développement social, Bamako, Mali  
9 581 **Souleymane Sanogo** [ssanogo24@yahoo.fr](mailto:ssanogo24@yahoo.fr); Direction régionale de Tombouctou et établissement  
10 582 public hospitalier de Tombouctou, Tombouctou, Mali  
11 583 **Zoumana Doumbia** [zoumana.doumbia@yahoo.fr](mailto:zoumana.doumbia@yahoo.fr); Direction régionale de Tombouctou et  
12 584 établissement public hospitalier de Tombouctou, Tombouctou, Mali  
13 585 **Charles Dara** [darafmposfac@yahoo.fr](mailto:darafmposfac@yahoo.fr); Direction régionale de Tombouctou et établissement public  
14 586 hospitalier de Tombouctou, Tombouctou, Mali  
15 587 **Mathias Altmann** [mathias.altmann@u-bordeaux.fr](mailto:mathias.altmann@u-bordeaux.fr); INSERM, IRD, Bordeaux Population Health,  
16 588 Bordeaux, France  
17 589 **Emmanuel Bonnet** [emmanuel.bonnet@ird.fr](mailto:emmanuel.bonnet@ird.fr); IRD, Unité resiliance, Paris, France  
18 590 **Hubert Balique** [hubertbalique@hotmail.com](mailto:hubertbalique@hotmail.com); Direction générale de la santé et de l'hygiène publique  
19 591 du ministère de la santé et du développement social, Bamako, Mali  
20 592 **Luis Sagaon-Teyssier** [luis.sagaon-teyssier@ird.fr](mailto:luis.sagaon-teyssier@ird.fr); IRD, INSERM, Aix Marseille Univ, SESSTIM, ISSPAM,  
21 593 Marseille, France & ARCAD Santé Plus / Centre Intégré de Recherche, de Soins et d'Action  
22 594 Communautaire (CIRSAC), Bamako, Mali  
23 595 **Laurent Vidal** [laurent.vidal@ird.fr](mailto:laurent.vidal@ird.fr); IRD, INSERM, Aix Marseille Univ, SESSTIM, ISSPAM, Marseille,  
24 596 France  
25 597 **Issaka Sagara** [isagara@icermali.org](mailto:isagara@icermali.org); Malaria Research and Training Center, Université des Sciences,  
26 598 Techniques et Technologies, Bamako, Mali  
27 599 **Marc-Karim Bendiane** [marc-karim.bendiane@inserm.fr](mailto:marc-karim.bendiane@inserm.fr); IRD, INSERM, Aix Marseille Univ, SESSTIM,  
30 600 ISSPAM, Marseille, France  
31 601 **Jean Gaudart** [jean.gaudart@univ-amu.fr](mailto:jean.gaudart@univ-amu.fr); IRD, INSERM, Aix Marseille Univ, SESSTIM, ISSPAM,  
32 602 Marseille, AP-HM, Hopital La Timone, BioSTIC, Biostatistics and Modeling unit, France  
33 603  
34 604  
35 605

## References

- 36 605  
37 606 1. Dhama K, Khan S, Tiwari R, Sircar S, Bhat S, Malik YS, et al. Coronavirus Disease 2019–COVID-19.  
38 607 Clin Microbiol Rev. 2020;33:e00028-20.  
39 608  
40 609 2. Van Damme W, Dahake R, Delamou A, Ingelbeen B, Wouters E, Vanham G, et al. The COVID-19  
41 610 pandemic: diverse contexts; different epidemics-how and why? BMJ Glob Health. 2020;5:e003098.  
42 611  
43 612 3. Bonnet E, Bodson O, Le Marcis F, Faye A, Sambieni NE, Fournet F, et al. The COVID-19 pandemic in  
44 613 francophone West Africa: from the first cases to responses in seven countries. BMC Public Health.  
45 614 2021;21:1490.  
46 615  
47 616 4. INSP Mali. Rapport Institut Nationa de la Santé Publique Mali. 2020.  
48 617  
49 618 5. Moraga P, Ketcheson DI, Ombao HC, Duarte CM. Assessing the age- and gender-dependence of the  
50 619 severity and case fatality rates of COVID-19 disease in Spain. Wellcome Open Res. 2020;5:117.  
51 620  
52 621 6. Sagara I, Woodford J, Kone M, Assadou MH, Katile A, Attaher O, et al. Rapidly increasing SARS-CoV-  
53 622 2 seroprevalence and limited clinical disease in three Malian communities: a prospective cohort  
54 623 study. Clin Infect Dis. 2021.  
55 624  
56 625  
57 626  
58 627  
59 628  
60 629



- 1  
2  
3 619 7. Nkuba AN, Makiala SM, Guichet E, Tshiminyi PM, Bazitama YM, Yambayamba MK, et al. High  
4 620 prevalence of anti-SARS-CoV-2 antibodies after the first wave of COVID-19 in Kinshasa, Democratic  
5 621 Republic of the Congo: results of a cross-sectional household-based survey. *Clin Infect Dis*. 2021.  
6  
7 622 8. World Health Organization. Population-based age-stratified seroepidemiological investigation  
8 623 protocol for COVID-19 virus infection, 17 March 2020. World Health Organization; 2020.  
9  
10 624 9. Bennett S, Radalowicz A, Vella V, Tomkins A. A computer simulation of household sampling  
11 625 schemes for health surveys in developing countries. *Int J Epidemiol*. 1994;23:1282–91.  
12  
13 626 10. BIOMÉRIEUX SA. BioMérieux | VIDAS® SARS-COV-2. [https://go.biomerieux.com/SEROLOGIE-](https://go.biomerieux.com/SEROLOGIE-VIDAS-SARS-COV-2)  
14 627 [VIDAS-SARS-COV-2](https://go.biomerieux.com/SEROLOGIE-VIDAS-SARS-COV-2). Accessed 16 May 2022.  
15  
16  
17 628 11. The Novel Coronavirus Pneumonia Emergency Response Epidemiology Team. The  
18 629 Epidemiological Characteristics of an Outbreak of 2019 Novel Coronavirus Diseases (COVID-19) —  
19 630 China, 2020. *China CDC Wkly*. 2020;2:113–22.  
20  
21 631 12. Lê S, Josse J, Husson F. FactoMineR: An R Package for Multivariate Analysis. *J Stat Softw*.  
22 632 2008;25:1–18.  
23  
24 633 13. Kim J, Zhang Y, Day J, Zhou H. MGLM: An R Package for Multivariate Categorical Data Analysis. *R J*.  
25 634 2018;10:73–90.  
26  
27  
28 635 14. Milligan P, Njie A, Bennett S. Comparison of two cluster sampling methods for health surveys in  
29 636 developing countries. *Int J Epidemiol*. 2004;33:469–76.  
30  
31 637 15. Simon N Wood. *generalized Additive Models : An introduction with R*. 2006;:392.  
32  
33 638 16. Uyoga S, Adetifa IMO, Karanja HK, Nyagwange J, Tuju J, Wanjiku P, et al. Seroprevalence of anti-  
34 639 SARS-CoV-2 IgG antibodies in Kenyan blood donors. *Science*. 2021;371:79–82.  
35  
36 640 17. Diallo AI, Faye A, Tine JAD, Ba MF, Gaye I, Bonnet E, et al. Factors associated with the  
37 641 acceptability of government measures to address COVID-19 in Senegal. *Rev D'Épidémiologie Santé*  
38 642 *Publique*. 2022. <https://doi.org/10.1016/j.respe.2022.03.123>.  
39  
40  
41 643 18. Naranbhai V, Chang CC, Beltran WFG, Miller TE, Astudillo MG, Villalba JA, et al. High  
42 644 Seroprevalence of Anti-SARS-CoV-2 Antibodies in Chelsea, Massachusetts. *J Infect Dis*.  
43 645 2020;222:1955–9.  
44  
45 646 19. Malloy TE, Fisher WA, Albright L, Misovich SJ, Fisher JD. Interpersonal perception of the AIDS risk  
46 647 potential of persons of the opposite sex. *Health Psychol Off J Div Health Psychol Am Psychol Assoc*.  
47 648 1997;16:480–6.  
48  
49 649 20. Gay L, Melenotte C, Lakbar I, Mezouar S, Devaux C, Raoult D, et al. Sexual Dimorphism and  
50 650 Gender in Infectious Diseases. *Front Immunol*. 2021;12.  
51  
52  
53 651 21. Tazerji SS, Shahabinejad F, Tokasi M, Rad MA, Khan MS, Safdar M, et al. Global data analysis and  
54 652 risk factors associated with morbidity and mortality of COVID-19. *Gene Rep*. 2022;26:101505.  
55  
56 653 22. Bienvenu LA, Noonan J, Wang X, Peter K. Higher mortality of COVID-19 in males: sex differences  
57 654 in immune response and cardiovascular comorbidities. *Cardiovasc Res*. 2020;:cvaa284.  
58  
59  
60

- 1  
2  
3 655 23. Ravindra K, Malik VS, Padhi BK, Goel S, Gupta M. Asymptomatic infection and transmission of  
4 656 COVID-19 among clusters: systematic review and meta-analysis. *Public Health*. 2022;203:100–9.  
5  
6 657 24. Song W-L, Zou N, Guan W-H, Pan J-L, Xu W. Clinical characteristics of COVID-19 in family clusters:  
7 658 a systematic review. *World J Pediatr WJP*. 2021;17:355–63.  
8  
9 659 25. Rader B, Scarpino SV, Nande A, Hill AL, Adlam B, Reiner RC, et al. Crowding and the shape of  
10 660 COVID-19 epidemics. *Nat Med*. 2020;26:1829–34.  
11  
12 661 26. Markovič R, Šterk M, Marhl M, Perc M, Gosak M. Socio-demographic and health factors drive the  
13 662 epidemic progression and should guide vaccination strategies for best COVID-19 containment.  
14 663 *Results Phys*. 2021;26:104433.  
15  
16 664 27. Fortaleza CMCB, Guimarães RB, de Almeida GB, Pronunciante M, Ferreira CP. Taking the inner  
17 665 route: spatial and demographic factors affecting vulnerability to COVID-19 among 604 cities from  
18 666 inner São Paulo State, Brazil. *Epidemiol Infect*. 2020;148:e118.  
19  
20 667 28. Martin CA, Jenkins DR, Minhas JS, Gray LJ, Tang J, Williams C, et al. Socio-demographic  
21 668 heterogeneity in the prevalence of COVID-19 during lockdown is associated with ethnicity and  
22 669 household size: Results from an observational cohort study. *EclinicalMedicine*. 2020;25:100466.  
23  
24 670 29. Zhang Y, Wang L, Zhu JJH, Wang X. The spatial dissemination of COVID-19 and associated socio-  
25 671 economic consequences. *J R Soc Interface*. 2022;19:20210662.  
26  
27  
28  
29 672  
30  
31  
32  
33  
34  
35  
36  
37  
38  
39  
40  
41  
42  
43  
44  
45  
46  
47  
48  
49  
50  
51  
52  
53  
54  
55  
56  
57  
58  
59  
60

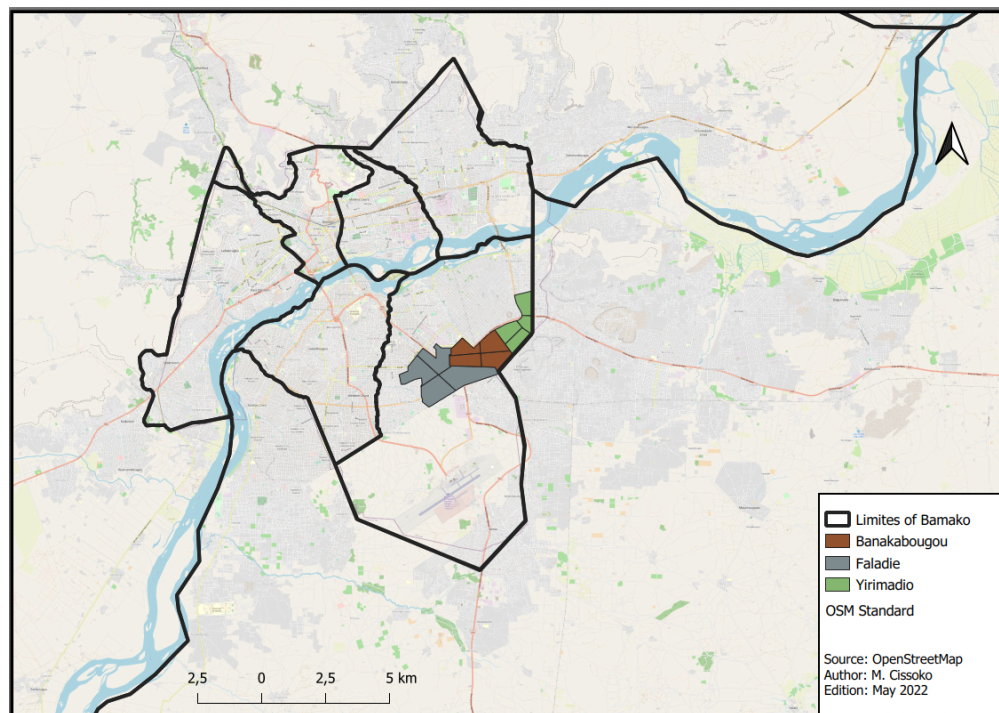

31  
32  
33  
34  
35  
36  
37  
38  
39  
40  
41  
42  
43  
44  
45  
46  
47  
48  
49  
50  
51  
52  
53  
54  
55  
56  
57  
58  
59  
60

501x356mm (57 x 57 DPI)

1  
2  
3  
4  
5  
6  
7  
8  
9  
10  
11  
12  
13  
14  
15  
16  
17  
18  
19  
20  
21  
22  
23  
24  
25  
26  
27  
28  
29  
30  
31  
32  
33  
34  
35  
36  
37  
38  
39  
40  
41  
42  
43  
44  
45  
46  
47  
48  
49  
50  
51  
52  
53  
54  
55  
56  
57  
58  
59  
60



855x481mm (38 x 38 DPI)

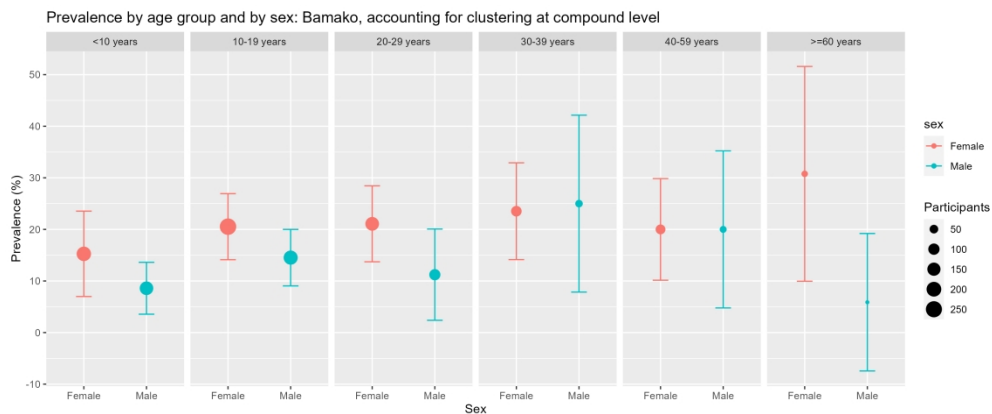

774x322mm (118 x 118 DPI)

**Appendix****Table A1: Study participants' demographic characteristics and detailed serological results (Bamako, n=1,526, September 2020).**

|                           |                      | n            | %          |
|---------------------------|----------------------|--------------|------------|
| <b>Site</b>               |                      |              |            |
|                           | Banankabougou        | 588          | 38.5       |
|                           | Faladie              | 300          | 19.7       |
|                           | Yirimadio            | 638          | 41.8       |
| <b>Total</b>              |                      | <b>1,526</b> | <b>100</b> |
| <b>Gender</b>             |                      |              |            |
|                           | Male                 | 599          | 39.3       |
|                           | Female               | 927          | 60.7       |
| <b>Total</b>              |                      | <b>1,526</b> | <b>100</b> |
| <b>Age</b>                |                      |              |            |
|                           | [1-10y]              | 416          | 27.3       |
|                           | [10-20y]             | 491          | 32.2       |
|                           | [20-30y]             | 299          | 19.6       |
|                           | [30-40y]             | 144          | 9.4        |
|                           | [40-60y]             | 118          | 7.7        |
|                           | [60-100]             | 51           | 3.3        |
|                           | NA                   | 7            | 0.5        |
| <b>Total</b>              |                      | <b>1,526</b> | <b>100</b> |
| <b>SARS-CoV-2 status</b>  |                      |              |            |
|                           | Negative             | 1100         | 72.1       |
|                           | Positive             | 227          | 14.9       |
|                           | NA                   | 199          | 13.0       |
| <b>Total</b>              |                      | <b>1,526</b> | <b>100</b> |
| <b>Detailed positives</b> |                      |              |            |
|                           | IgG pos only         | 170          | 74.89      |
|                           | IgM pos only         | 17           | 7.49       |
|                           | IgG+IgM              | 35           | 15.42      |
|                           | IgG pos, IgM missing | 5            | 2.20       |
| <b>Total</b>              |                      | <b>227</b>   | <b>100</b> |

**Table A2. Knowledges, attitudes, behaviors and practices toward COVID-19 among Bamako inhabitants, by sex (Bamako, n=962, 2020)**

|            | Sex % |       | Univariate*<br>[Women vs Men] |         | Multivariate*<br>[Women vs Men] |         |
|------------|-------|-------|-------------------------------|---------|---------------------------------|---------|
|            | Men   | Women | OR [CI95%]                    | p-value | aOR [CI95%]                     | p-value |
| <i>Age</i> |       |       |                               |         |                                 |         |

|                                                                                                                   |           |            |            |                     |       |                     |       |
|-------------------------------------------------------------------------------------------------------------------|-----------|------------|------------|---------------------|-------|---------------------|-------|
|                                                                                                                   | 12-19 y   | 55.9%      | 44.1%      | 1                   |       |                     |       |
|                                                                                                                   | 20-39 y   | 53.9%      | 36.1%      | 1.25<br>[0.54;2.90] | 0.62  | --                  | --    |
|                                                                                                                   | 29-64 y   | 50.5%      | 49.5%      | 1.35<br>[0.57;3.20] | 0.49  | --                  | --    |
|                                                                                                                   | >64y      | 62.5%      | 37.5%      | 1.54<br>[0.62;3.87] | 0.35  | --                  | --    |
| <i>Level of Knowledge toward Covid-19</i>                                                                         |           |            |            |                     |       |                     |       |
| 13 items- score                                                                                                   | Mean [SD] | 7.90[2.67] | 7.57[2.94] | 0.96<br>[0.91;1.00] | 0.063 | --                  | --    |
| <i>Attitudes/denials towards COVID-19 measured by agreement (agreed, strongly agreed) with following opinions</i> |           |            |            |                     |       |                     |       |
| Help politicians' strategy to take money from developed countries                                                 | No        | 52.4%      | 47.6%      | 1                   | 0.012 | 1                   | 0.013 |
|                                                                                                                   | Yes       | 61.3%      | 48.7%      | 0.70<br>[0.53;0.92] |       | 0.70<br>[0.52;0.93] |       |
| <i>Systematic daily changes in behaviors reported from the start of COVID-19 pandemic</i>                         |           |            |            |                     |       |                     |       |
| Blowing into the elbow                                                                                            | No        | 53.7%      | 46.3%      | 1                   | 0.030 | 1                   | 0.023 |
|                                                                                                                   | Yes       | 64.5%      | 35.5%      | 0.65<br>[0.44;0.96] |       | 0.59<br>[0.38;0.93] |       |
| Avoiding seeing friends                                                                                           | No        | 55.7%      | 44.3%      | 1                   | 0.173 | 1                   | 0.004 |
|                                                                                                                   | Yes       | 46.9%      | 53.1%      | 1.42<br>[0.86;2.37] |       | 2.03<br>[1.30;4.20] |       |
| <i>At-risk practices during the seven past days declared \$</i>                                                   |           |            |            |                     |       |                     |       |
| Wearing mask outside                                                                                              | No        | 57.7%      | 42.3%      | 1                   | 0.055 | 1                   | 0.005 |
|                                                                                                                   | Yes       | 51.6%      | 48.4%      | 0.78<br>[0.60;1.01] |       | 0.68<br>[0.52;0.89] |       |
| Visiting populated public places                                                                                  | No        | 50.5%      | 49.5%      | 1                   | 0.001 | 1                   | 0.001 |
|                                                                                                                   | Yes       | 61.9%      | 38.1%      | 1.59<br>[1.23;2.07] |       | 1.71<br>[1.30;2.26] |       |

\$ Binary variable: yes [systematically, very often, often] and no [rarely, never]

\*Logistic regression

**Table A3: Score of knowledge on COVID-19 by sex and age (Bamako, n=962, September 2020).**

|               | 12-19y<br>(62.2%)<br>Mean [SD] | 20-39y<br>(25.3%)<br>Mean [SD] | 40-64y<br>(10.1%)<br>Mean [SD] | >64y<br>(2.5%)<br>Mean [SD] |
|---------------|--------------------------------|--------------------------------|--------------------------------|-----------------------------|
| All           | 7.5 [2.8]                      | 8.2 [2.7]                      | 8.1 [2.5]                      | 8.3 [2.6]                   |
| Men (55.1%)   | 7.7 [2.7]                      | 8.3 [2.7]                      | 7.9 [2.3]                      | 8.8 [2.2]                   |
| Women (44.9%) | 7.2 [3.0]                      | 8.1 [2.8]                      | 8.3 [2.7]                      | 7.4 [3.0]                   |
| p-value*      | 0.04                           | 0.43                           | 0.36                           | 0.19                        |

\*t-test, Men VS Women

STROBE Statement—Checklist of items that should be included in reports of *cross-sectional studies*

|                              | Item No | Recommendation                                                                                                                                                                                                                                                                                                                                                                                                                                                                                                                                                        |
|------------------------------|---------|-----------------------------------------------------------------------------------------------------------------------------------------------------------------------------------------------------------------------------------------------------------------------------------------------------------------------------------------------------------------------------------------------------------------------------------------------------------------------------------------------------------------------------------------------------------------------|
| <b>Title and abstract</b>    | 1       | <a href="#">Yes, lines 1-2 and abstract lines 31:65</a><br>(b) Provide in the abstract an informative and balanced summary of what was done and what was found; <a href="#">Yes, lines 41:52 and 54:59</a>                                                                                                                                                                                                                                                                                                                                                            |
| <b>Introduction</b>          |         |                                                                                                                                                                                                                                                                                                                                                                                                                                                                                                                                                                       |
| Background/rationale         | 2       | <a href="#">Yes, lines 85:128</a>                                                                                                                                                                                                                                                                                                                                                                                                                                                                                                                                     |
| Objectives                   | 3       | <a href="#">Yes, lines 129:132</a>                                                                                                                                                                                                                                                                                                                                                                                                                                                                                                                                    |
| <b>Methods</b>               |         |                                                                                                                                                                                                                                                                                                                                                                                                                                                                                                                                                                       |
| Study design                 | 4       | Present key elements of study design early in the paper: <a href="#">Yes lines 135:141</a>                                                                                                                                                                                                                                                                                                                                                                                                                                                                            |
| Setting                      | 5       | Describe the setting locations: <a href="#">Yes lines 135:141 and Figure 1</a> and relevant dates <a href="#">Yes, line 139</a> including periods of recruitment: <a href="#">Yes, line 167</a> and data collection: <a href="#">Yes, line 139</a>                                                                                                                                                                                                                                                                                                                    |
| Participants                 | 6       | (a) Give the eligibility criteria, and the sources and methods of selection of participants: <a href="#">Yes, lines 147-163 and 165-172</a>                                                                                                                                                                                                                                                                                                                                                                                                                           |
| Variables                    | 7       | Clearly define all outcomes, exposures, predictors, potential confounders, and effect modifiers. Give diagnostic criteria, if applicable: <a href="#">Yes, lines 174-180, 184-204, 206-216</a>                                                                                                                                                                                                                                                                                                                                                                        |
| Data sources/<br>measurement | 8*      | For each variable of interest, give sources of data and details of methods of assessment (measurement). Describe comparability of assessment methods if there is more than one group: <a href="#">Yes, lines 174-180, 184-204, 206-216</a>                                                                                                                                                                                                                                                                                                                            |
| Bias                         | 9       | Describe any efforts to address potential sources of bias: <a href="#">Yes lines 151-163</a>                                                                                                                                                                                                                                                                                                                                                                                                                                                                          |
| Study size                   | 10      | Explain how the study size was arrived at: <a href="#">Yes, lines 138-150</a>                                                                                                                                                                                                                                                                                                                                                                                                                                                                                         |
| Quantitative variables       | 11      | Explain how quantitative variables were handled in the analyses. If applicable, describe which groupings were chosen and why: <a href="#">Yes, Lines 219-220</a>                                                                                                                                                                                                                                                                                                                                                                                                      |
| Statistical methods          | 12      | (a) Describe all statistical methods, including those used to control for confounding: <a href="#">Yes, lines 219:239</a><br>(b) Describe any methods used to examine subgroups and interactions: <a href="#">Yes, lines 233-234</a><br>(c) Explain how missing data were addressed: <a href="#">Complete Case analyses were performed</a><br>(d) If applicable, describe analytical methods taking account of sampling strategy: <a href="#">Yes, lines 226-233</a><br>(e) Describe any sensitivity analyses: <a href="#">No sensitivity analyses were performed</a> |
| <b>Results</b>               |         |                                                                                                                                                                                                                                                                                                                                                                                                                                                                                                                                                                       |
| Participants                 | 13*     | (a) Report numbers of individuals at each stage of study—eg numbers potentially eligible, examined for eligibility, confirmed eligible, included in the study, completing follow-up, and analysed: <a href="#">Yes, lines 272:277</a><br>(b) Give reasons for non-participation at each stage: <a href="#">Yes, figure 2</a><br>(c) Consider use of a flow diagram: <a href="#">Yes, figure 2</a>                                                                                                                                                                     |
| Descriptive data             | 14*     | (a) Give characteristics of study participants (eg demographic, clinical, social) and information on exposures and potential confounders: <a href="#">Yes, 272:277, and table A1</a><br>(b) Indicate number of participants with missing data for each variable of interest: <a href="#">Yes, line 283 and table 3</a>                                                                                                                                                                                                                                                |



|                          |     |                                                                                                                                                                                                                                                                                                                                                                                                                                                                                                                          |
|--------------------------|-----|--------------------------------------------------------------------------------------------------------------------------------------------------------------------------------------------------------------------------------------------------------------------------------------------------------------------------------------------------------------------------------------------------------------------------------------------------------------------------------------------------------------------------|
| Outcome data             | 15* | Report numbers of outcome events or summary measures: <a href="#">Yes, tables 2, 3, 4 and 5</a>                                                                                                                                                                                                                                                                                                                                                                                                                          |
| Main results             | 16  | (a) Give unadjusted estimates and, if applicable, confounder-adjusted estimates and their precision (eg, 95% confidence interval). Make clear which confounders were adjusted for and why they were included : <a href="#">Yes, table 1, 2, 3</a><br>(b) Report category boundaries when continuous variables were categorized: <a href="#">No categorization</a><br>(c) If relevant, consider translating estimates of relative risk into absolute risk for a meaningful time period: <a href="#">No RR estimations</a> |
| Other analyses           | 17  | Report other analyses done—eg analyses of subgroups and interactions, and sensitivity analyses: <a href="#">Qualitative analyses were performed lines 349:37_ and tables 4, 5 and A2, A3</a>                                                                                                                                                                                                                                                                                                                             |
| <b>Discussion</b>        |     |                                                                                                                                                                                                                                                                                                                                                                                                                                                                                                                          |
| Key results              | 18  | Summarise key results with reference to study objectives: <a href="#">Yes lines 386:396</a>                                                                                                                                                                                                                                                                                                                                                                                                                              |
| Limitations              | 19  | Discuss limitations of the study, taking into account sources of potential bias or imprecision. Discuss both direction and magnitude of any potential bias: <a href="#">Yes lines 426:447</a>                                                                                                                                                                                                                                                                                                                            |
| Interpretation           | 20  | Give a cautious overall interpretation of results considering objectives, limitations, multiplicity of analyses, results from similar studies, and other relevant evidence / <a href="#">Yes lines 426:447 and 448:465</a>                                                                                                                                                                                                                                                                                               |
| Generalisability         | 21  | Discuss the generalisability (external validity) of the study results: <a href="#">Yes, 466:474 and 480-490</a>                                                                                                                                                                                                                                                                                                                                                                                                          |
| <b>Other information</b> |     |                                                                                                                                                                                                                                                                                                                                                                                                                                                                                                                          |
| Funding                  | 22  | Give the source of funding and the role of the funders for the present study and, if applicable, for the original study on which the present article is based: <a href="#">Yes, lines 522:528</a>                                                                                                                                                                                                                                                                                                                        |
