# Supplementary material for: SARS-CoV-2 seroprevalence and living conditions in Bamako (Mali): a cross-sectional multistage household survey after the first epidemic wave, 2020
Source: PubMed Central journal article supplement — BMJ Open. 2023 Apr 20;13(4):e067124. doi: 10.1136/bmjopen-2022-067124 (PMC10123860; doi:10.1136/bmjopen-2022-067124), 2023-04-20
Supplement: bmjopen-2022-067124supp001.pdf [file bmjopen-2022-067124supp001.pdf]

**Appendix****Table A1: Study participants' demographic characteristics and detailed serological results (Bamako, n=1,526, September 2020).**

|                           |                      | n            | %          |
|---------------------------|----------------------|--------------|------------|
| <b>Site</b>               |                      |              |            |
|                           | Banankabougou        | 588          | 38.5       |
|                           | Faladie              | 300          | 19.7       |
|                           | Yirimadio            | 638          | 41.8       |
| <b>Total</b>              |                      | <b>1,526</b> | <b>100</b> |
| <b>Gender</b>             |                      |              |            |
|                           | Male                 | 599          | 39.3       |
|                           | Female               | 927          | 60.7       |
| <b>Total</b>              |                      | <b>1,526</b> | <b>100</b> |
| <b>Age</b>                |                      |              |            |
|                           | [1-10y]              | 416          | 27.3       |
|                           | [10-20y]             | 491          | 32.2       |
|                           | [20-30y]             | 299          | 19.6       |
|                           | [30-40y]             | 144          | 9.4        |
|                           | [40-60y]             | 118          | 7.7        |
|                           | [60-100]             | 51           | 3.3        |
|                           | NA                   | 7            | 0.5        |
| <b>Total</b>              |                      | <b>1,526</b> | <b>100</b> |
| <b>SARS-CoV-2 status</b>  |                      |              |            |
|                           | Negative             | 1100         | 72.1       |
|                           | Positive             | 227          | 14.9       |
|                           | NA                   | 199          | 13.0       |
| <b>Total</b>              |                      | <b>1,526</b> | <b>100</b> |
| <b>Detailed positives</b> |                      |              |            |
|                           | IgG pos only         | 170          | 74.89      |
|                           | IgM pos only         | 17           | 7.49       |
|                           | IgG+IgM              | 35           | 15.42      |
|                           | IgG pos, IgM missing | 5            | 2.20       |
| <b>Total</b>              |                      | <b>227</b>   | <b>100</b> |

**Table A2. Knowledges, attitudes, behaviors and practices toward COVID-19 among Bamako inhabitants, by sex (Bamako, n=962, 2020)**

|            | Sex % |       | Univariate*<br>[Women vs Men] |         | Multivariate*<br>[Women vs Men] |         |
|------------|-------|-------|-------------------------------|---------|---------------------------------|---------|
|            | Men   | Women | OR [CI95%]                    | p-value | aOR [CI95%]                     | p-value |
| <i>Age</i> |       |       |                               |         |                                 |         |

|                                                                                                                   |           |            |            |                     |       |                     |       |
|-------------------------------------------------------------------------------------------------------------------|-----------|------------|------------|---------------------|-------|---------------------|-------|
|                                                                                                                   | 12-19 y   | 55.9%      | 44.1%      | 1                   |       |                     |       |
|                                                                                                                   | 20-39 y   | 53.9%      | 36.1%      | 1.25<br>[0.54;2.90] | 0.62  | --                  | --    |
|                                                                                                                   | 29-64 y   | 50.5%      | 49.5%      | 1.35<br>[0.57;3.20] | 0.49  | --                  | --    |
|                                                                                                                   | >64y      | 62.5%      | 37.5%      | 1.54<br>[0.62;3.87] | 0.35  | --                  | --    |
| <i>Level of Knowledge toward Covid-19</i>                                                                         |           |            |            |                     |       |                     |       |
| 13 items- score                                                                                                   | Mean [SD] | 7.90[2.67] | 7.57[2.94] | 0.96<br>[0.91;1.00] | 0.063 | --                  | --    |
| <i>Attitudes/denials towards COVID-19 measured by agreement (agreed, strongly agreed) with following opinions</i> |           |            |            |                     |       |                     |       |
| Help politicians' strategy to take money from developed countries                                                 | No        | 52.4%      | 47.6%      | 1                   | 0.012 | 1                   | 0.013 |
|                                                                                                                   | Yes       | 61.3%      | 48.7%      | 0.70<br>[0.53;0.92] |       | 0.70<br>[0.52;0.93] |       |
| <i>Systematic daily changes in behaviors reported from the start of COVID-19 pandemic</i>                         |           |            |            |                     |       |                     |       |
| Blowing into the elbow                                                                                            | No        | 53.7%      | 46.3%      | 1                   | 0.030 | 1                   | 0.023 |
|                                                                                                                   | Yes       | 64.5%      | 35.5%      | 0.65<br>[0.44;0.96] |       | 0.59<br>[0.38;0.93] |       |
| Avoiding seeing friends                                                                                           | No        | 55.7%      | 44.3%      | 1                   | 0.173 | 1                   | 0.004 |
|                                                                                                                   | Yes       | 46.9%      | 53.1%      | 1.42<br>[0.86;2.37] |       | 2.03<br>[1.30;4.20] |       |
| <i>At-risk practices during the seven past days declared §</i>                                                    |           |            |            |                     |       |                     |       |
| Wearing mask outside                                                                                              | No        | 57.7%      | 42.3%      | 1                   | 0.055 | 1                   | 0.005 |
|                                                                                                                   | Yes       | 51.6%      | 48.4%      | 0.78<br>[0.60;1.01] |       | 0.68<br>[0.52;0.89] |       |
| Visiting populated public places                                                                                  | No        | 50.5%      | 49.5%      | 1                   | 0.001 | 1                   | 0.001 |
|                                                                                                                   | Yes       | 61.9%      | 38.1%      | 1.59<br>[1.23;2.07] |       | 1.71<br>[1.30;2.26] |       |

§ Binary variable: yes [systematically, very often, often] and no [rarely, never]

\*Logistic regression

**Table A3: Score of knowledge on COVID-19 by sex and age (Bamako, n=962, September 2020).**

|               | 12-19y<br>(62.2%)<br>Mean [SD] | 20-39y<br>(25.3%)<br>Mean [SD] | 40-64y<br>(10.1%)<br>Mean [SD] | >64y<br>(2.5%)<br>Mean [SD] |
|---------------|--------------------------------|--------------------------------|--------------------------------|-----------------------------|
| All           | 7.5 [2.8]                      | 8.2 [2.7]                      | 8.1 [2.5]                      | 8.3 [2.6]                   |
| Men (55.1%)   | 7.7 [2.7]                      | 8.3 [2.7]                      | 7.9 [2.3]                      | 8.8 [2.2]                   |
| Women (44.9%) | 7.2 [3.0]                      | 8.1 [2.8]                      | 8.3 [2.7]                      | 7.4 [3.0]                   |
| p-value*      | 0.04                           | 0.43                           | 0.36                           | 0.19                        |

\*t-test, Men VS Women
